# Supplementary material for: Lewis-acid-catalyzed phosphorylation of alcohols
Source: Royal Society of Chemistry journal article supplement (doi:10.1039/d3ra08214h), 2024-01-01

## Supporting Information

# Lewis Acid Catalyzed Phosphorylation of Alcohol

Xiao-Hong Wang, Xuan Liu, Ya-Wen Xue, Yan-Bin Wang, Xiao-Hong Wei\* and  
Qiong Su\*

<sup>a</sup> *Key Laboratory for Utility of Environment-Friendly Composite Materials and Biomass in University of Gansu Province, College of Chemical Engineering, Northwest Minzu University, No. 1, Northwest Xincun, Lanzhou, 730030, P.R. China.*

E-mail: [weixh12@lzu.edu.cn](mailto:weixh12@lzu.edu.cn); [hgsq@xbmu.edu.cn](mailto:hgsq@xbmu.edu.cn)

### Contents

|                                                                                       |    |
|---------------------------------------------------------------------------------------|----|
| General .....                                                                         | S2 |
| Experimental Section .....                                                            | S2 |
| 1. General procedure for synthesis of 3 .....                                         | S2 |
| 2. Analytical Data of Products .....                                                  | S2 |
| <sup>1</sup> H, <sup>13</sup> C and <sup>31</sup> P NMR and spectra of Products ..... | S8 |

## General

All chemicals were purchased from Aldrich and J&K Chemical and used without further purification. Thin-layer chromatography (TLC) was performed using 60 mesh silica gel plates visualized with short-wavelength UV light (254 nm). Silica gel 60 (230-400 mesh) was used for column chromatography.  $^1\text{H}$ ,  $^{13}\text{C}$  and  $^{31}\text{P}$  NMR spectra were recorded using  $\text{CDCl}_3$  solvent on a Bruker advance III 400 spectrometer (400 MHz for  $^1\text{H}$ , 162 MHz for  $^{31}\text{P}$  and 101 MHz for  $^{13}\text{C}$ ), The chemical shift is given in dimensionless  $\delta$  values and is frequency referenced relative to TMS in  $^1\text{H}$  and  $^{13}\text{C}$  NMR spectroscopy. HRMS were measured with Bruker micro TOF-Q II mass spectrometer equipped with electrospray ionization (ESI).

## Experimental Section

### 1. General procedure for synthesis of 3

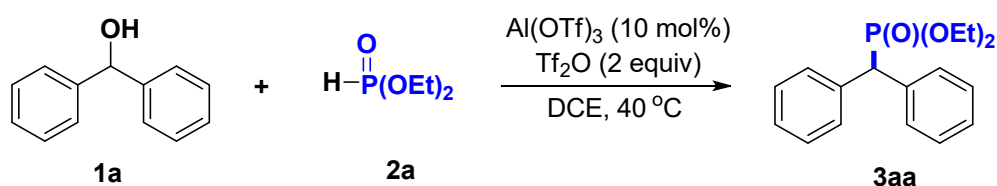

An oven-dried 10 mL screw-capped vial containing **1a** (0.3 mmol, 1.0 equiv),  $\text{Al}(\text{OTf})_3$  (0.03 mmol, 0.1 equiv), and  $\text{DCE}$  (2 mL) was added *via* syringe, diethyl phosphonate **2a** (0.75 mmol, 2.5 equiv),  $\text{Tf}_2\text{O}$  (0.6 mmol, 2.0 equiv), and then heated to  $40^\circ\text{C}$  in an oil bath until the starting material has disappeared for 14 hours (monitored by TLC). And then the solvent was removed in vacuo and residue was purified by column chromatography on a short silica gel column using EA/PE as eluent to afford the desired product **3aa**.

### 2. Analytical Data of Products

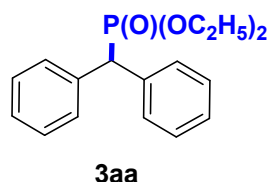

Colorless liquid.  $^1\text{H}$  NMR (400 MHz,  $\text{CDCl}_3$ )  $\delta$  7.53 (d,  $J = 7.8$  Hz, 4H), 7.30 (t,  $J = 7.4$  Hz, 4H), 7.27 – 7.18 (m, 2H), 4.43 (d,  $J = 25.1$  Hz, 1H), 4.05 – 3.91 (m, 2H), 3.91 – 3.75 (m, 2H), 1.10 (t,  $J = 7.1$  Hz, 6H).

$^{13}\text{C}$  NMR (101 MHz,  $\text{CDCl}_3$ )  $\delta$  136.72 (d,  $J = 5.2$  Hz), 129.36 (d,  $J = 8.0$  Hz), 128.47

(d,  $J = 1.2$  Hz), 127.03 (d,  $J = 2.1$  Hz), 62.59 (d,  $J = 7.0$  Hz), 51.19 (d,  $J = 138.2$  Hz), 16.13 (d,  $J = 5.8$  Hz).

$^{31}\text{P}$  NMR (162 MHz,  $\text{CDCl}_3$ )  $\delta$  25.07.

HRMS (ESI) Calcd. for  $\text{C}_{17}\text{H}_{21}\text{O}_3\text{P}$   $[\text{M}+\text{Na}]^+$ : 327.1121, found 327.1120.

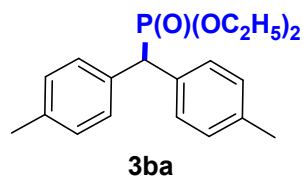

Yellowish liquid.  $^1\text{H}$  NMR (400 MHz,  $\text{CDCl}_3$ )  $\delta$  7.39 (d,  $J = 8.1$  Hz, 4H), 7.10 (d,  $J = 8.0$  Hz, 4H), 4.36 (d,  $J = 25.1$  Hz, 1H), 4.06 – 3.91 (m, 2H), 3.91 – 3.74 (m, 2H), 2.29 (s, 6H), 1.12 (t,  $J = 7.1$  Hz, 6H).

$^{13}\text{C}$  NMR (101 MHz,  $\text{CDCl}_3$ )  $\delta$  136.52 (d,  $J = 2.3$  Hz), 133.85 (d,  $J = 5.2$  Hz), 129.14 (d,  $J = 1.3$  Hz), 129.07, 62.50 (d,  $J = 7.1$  Hz), 50.27 (d,  $J = 138.3$  Hz), 16.16 (d,  $J = 5.8$  Hz), 20.92.

$^{31}\text{P}$  NMR (162 MHz,  $\text{CDCl}_3$ )  $\delta$  25.57.

HRMS (ESI) Calcd. for  $\text{C}_{19}\text{H}_{25}\text{O}_3\text{P}$   $[\text{M}+\text{Na}]^+$ : 355.1434, found 355.1429.

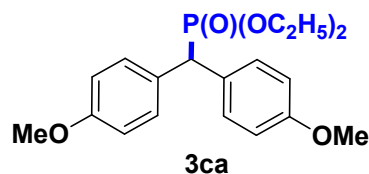

Yellowish liquid.  $^1\text{H}$  NMR (400 MHz,  $\text{CDCl}_3$ )  $\delta$  7.42 (d,  $J = 7.0$  Hz, 4H), 6.84 (d,  $J = 8.6$  Hz, 4H), 4.33 (d,  $J = 25.3$  Hz, 1H), 4.04 – 3.90 (m, 2H), 3.90 – 3.79 (m, 2H), 3.76 (s, 6H), 1.13 (t,  $J = 7.1$  Hz, 6H).

$^{13}\text{C}$  NMR (101 MHz,  $\text{CDCl}_3$ )  $\delta$  158.51 (d,  $J = 2.0$  Hz), 130.30 (d,  $J = 8.0$  Hz), 129.17 (d,  $J = 5.0$  Hz), 113.86 (d,  $J = 1.0$  Hz), 62.47 (d,  $J = 7.1$  Hz), 55.11, 49.33 (d,  $J = 138.8$  Hz), 16.21 (d,  $J = 5.8$  Hz).

$^{31}\text{P}$  NMR (162 MHz,  $\text{CDCl}_3$ )  $\delta$  25.63.

HRMS (ESI) Calcd. for  $\text{C}_{19}\text{H}_{25}\text{O}_3\text{P}$   $[\text{M}+\text{Na}]^+$ : 387.1332, found 387.1330.

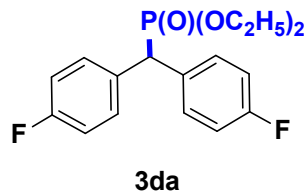

Yellowish liquid.  $^1\text{H}$  NMR (400 MHz,  $\text{CDCl}_3$ )  $\delta$  7.54 – 7.41 (m, 4H), 7.01 (t,  $J = 8.6$  Hz, 4H), 4.40 (d,  $J = 25.3$  Hz, 1H), 4.07 – 3.92 (m, 2H), 3.92 – 3.78 (m, 2H), 1.13 (t,  $J = 7.1$  Hz, 6H).

$^{13}\text{C}$  NMR (101 MHz,  $\text{CDCl}_3$ )  $\delta$  161.94 (dd,  $J_{\text{C-P}} = 2.3$  Hz,  $J_{\text{C-F}} = 246.3$  Hz), 132.48

(dd,  $J_{C-P} = 3.9$  Hz,  $J_{C-F} = 4.6$  Hz), 130.88 (t,  $J = 8.0$  Hz), 115.46 (dd,  $J_{C-P} = 1.0$  Hz,  $J_{C-F} = 21.4$  Hz), 62.68 (d,  $J = 7.1$  Hz), 49.45 (d,  $J = 139.6$  Hz), 16.17 (d,  $J = 5.8$  Hz).

$^{31}\text{P}$  NMR (162 MHz,  $\text{CDCl}_3$ )  $\delta$  24.50.

HRMS (ESI) Calcd. for  $\text{C}_{17}\text{H}_{19}\text{F}_2\text{O}_3\text{P}$  [ $\text{M} + \text{Na}$ ] $^+$ : 363.0932, found 363.0932.

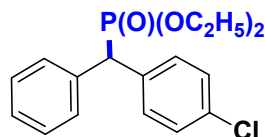

3ea

Yellowish liquid.  $^1\text{H}$  NMR (400 MHz,  $\text{CDCl}_3$ )  $\delta$  7.55 – 7.40 (m, 4H), 7.36 – 7.19 (m, 5H), 4.40 (d,  $J = 25.1$  Hz, 1H), 4.07 – 3.92 (m, 2H), 3.92 – 3.75 (m, 2H), 1.19 – 1.03 (m, 6H).

$^{13}\text{C}$  NMR (101 MHz,  $\text{CDCl}_3$ )  $\delta$  136.31 (d,  $J = 5.3$  Hz), 135.44 (d,  $J = 5.2$  Hz), 133.00 (d,  $J = 2.6$  Hz), 130.69 (d,  $J = 8.0$  Hz), 129.29 (d,  $J = 7.9$  Hz), 128.61, 127.25 (d,  $J = 2.1$  Hz), 62.75 (d,  $J = 7.1$  Hz), 62.55 (d,  $J = 7.1$  Hz), 50.49 (d,  $J = 138.8$  Hz), 16.16.

$^{31}\text{P}$  NMR (162 MHz,  $\text{CDCl}_3$ )  $\delta$  24.47.

HRMS (ESI) Calcd. for  $\text{C}_{17}\text{H}_{20}\text{ClO}_3\text{P}$  [ $\text{M} + \text{Na}$ ] $^+$ : 361.0731, found 361.0733.

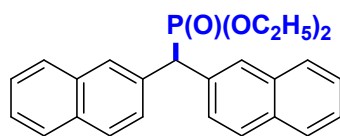

3fa

Brown solid. mp 107-109 °C.  $^1\text{H}$  NMR (400 MHz,  $\text{CDCl}_3$ )  $\delta$  8.08 (s, 2H), 7.88 – 7.62 (m, 8H), 7.48 – 7.33 (m, 4H), 4.78 (d,  $J = 25.0$  Hz, 1H), 4.11 – 3.94 (m, 2H), 3.94 – 3.77 (m, 2H), 1.10 (t,  $J = 7.1$  Hz, 6H).

$^{13}\text{C}$  NMR (101 MHz,  $\text{CDCl}_3$ )  $\delta$  134.21 (d,  $J = 5.2$  Hz), 133.29 (d,  $J = 1.3$  Hz), 132.33 (d,  $J = 1.3$  Hz), 128.24 (d,  $J = 8.8$  Hz), 128.16, 127.91, 127.55 (d,  $J = 7.7$  Hz), 127.45, 126.03, 125.86, 62.68 (d,  $J = 7.0$  Hz), 51.24 (d,  $J = 138.7$  Hz), 16.20 (d,  $J = 5.8$  Hz).

$^{31}\text{P}$  NMR (162 MHz,  $\text{CDCl}_3$ )  $\delta$  24.86.

HRMS (ESI) Calcd. for  $\text{C}_{25}\text{H}_{25}\text{O}_3\text{P}$  [ $\text{M} + \text{Na}$ ] $^+$ : 427.1434, found 427.1430.

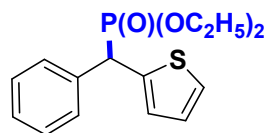

3ga

Brown liquid.  $^1\text{H}$  NMR (400 MHz,  $\text{CDCl}_3$ )  $\delta$  7.52 (d,  $J = 7.5$  Hz, 2H), 7.33 (t,  $J = 7.6$  Hz, 2H), 7.30 – 7.22 (m, 2H), 7.19 (d,  $J = 5.2$  Hz, 1H), 7.01 – 6.92 (m, 1H), 4.66 (d,  $J = 25.6$  Hz, 1H), 4.11 – 3.86 (m, 3H), 3.84 – 3.70 (m, 1H), 1.19 (t,  $J = 7.1$  Hz, 3H), 1.10 (t,  $J = 7.1$  Hz, 3H).

**<sup>13</sup>C NMR (101 MHz, CDCl<sub>3</sub>)** δ 138.71 (d, *J* = 5.3 Hz), 136.33 (d, *J* = 5.6 Hz), 129.28 (d, *J* = 7.0 Hz), 128.57 (d, *J* = 1.8 Hz), 127.48 (d, *J* = 2.5 Hz), 127.04 (d, *J* = 7.4 Hz), 126.89 (d, *J* = 2.4 Hz), 124.88 (d, *J* = 2.6 Hz), 63.05 (d, *J* = 7.0 Hz), 62.89 (d, *J* = 7.2 Hz), 46.32 (d, *J* = 140.2 Hz), 16.26 (d, *J* = 5.9 Hz), 16.18 (d, *J* = 5.8 Hz).

**<sup>31</sup>P NMR (162 MHz, CDCl<sub>3</sub>)** δ 23.14.

**HRMS (ESI)** Calcd. for C<sub>15</sub>H<sub>19</sub>O<sub>3</sub>PS [M+Na]<sup>+</sup>: 333.0685, found 333.0681.

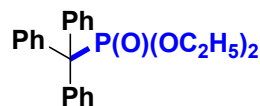

**3ha**

Yellowish solid. mp 104-106 °C. **<sup>1</sup>H NMR (400 MHz, CDCl<sub>3</sub>)** δ 7.39 – 7.19 (m, 15H), 4.10 – 3.92 (m, 2H), 3.92 – 3.75 (m, 2H), 1.09 (t, *J* = 7.1 Hz, 6H).

**<sup>13</sup>C NMR (101 MHz, CDCl<sub>3</sub>)** δ 141.55 (d, *J* = 5.5 Hz), 130.66 (d, *J* = 6.3 Hz), 127.77 (d, *J* = 1.0 Hz), 126.84 (d, *J* = 1.7 Hz), 63.26 (d, *J* = 8.2 Hz), 62.91 (d, *J* = 136.2 Hz), 16.11 (d, *J* = 5.7 Hz).

**<sup>31</sup>P NMR (121 MHz, CDCl<sub>3</sub>)** δ 27.06.

**HRMS (ESI)** Calcd. for C<sub>23</sub>H<sub>25</sub>O<sub>3</sub>P [M+Na]<sup>+</sup>: 403.1434, found 403.1430.

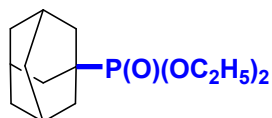

**3ia**

Yellowish liquid. **<sup>1</sup>H NMR (400 MHz, CDCl<sub>3</sub>)** δ 4.16 – 4.04 (m, 4H), 1.98 (s, 3H), 1.94 – 1.84 (m, 6H), 1.79 – 1.68 (m, 6H), 1.31 (t, *J* = 7.1 Hz, 6H).

**<sup>13</sup>C NMR (101 MHz, CDCl<sub>3</sub>)** δ 61.57 (d, *J* = 7.3 Hz), 36.50 (d, *J* = 1.7 Hz), 35.36 (d, *J* = 4.2 Hz), 34.18 (d, *J* = 147.3 Hz), 27.08 (d, *J* = 12.2 Hz), 16.52 (d, *J* = 5.7 Hz).

**<sup>31</sup>P NMR (121 MHz, CDCl<sub>3</sub>)** δ 33.77.

**HRMS (ESI)** Calcd. for C<sub>14</sub>H<sub>25</sub>O<sub>3</sub>P [M+Na]<sup>+</sup>: 295.1434, found 295.1432.

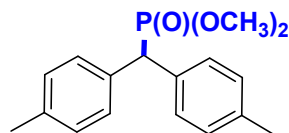

**3bb**

Yellowish liquid. **<sup>1</sup>H NMR (400 MHz, CDCl<sub>3</sub>)** δ 7.39 (d, *J* = 6.6 Hz, 4H), 7.12 (d, *J* = 7.9 Hz, 4H), 4.39 (d, *J* = 25.1 Hz, 1H), 3.56 (d, *J* = 10.7 Hz, 6H), 2.30 (s, 6H).

**<sup>13</sup>C NMR (101 MHz, CDCl<sub>3</sub>)** δ 136.77 (d, *J* = 2.4 Hz), 133.62 (d, *J* = 5.2 Hz), 129.32 (d, *J* = 1.4 Hz), 129.09 (d, *J* = 8.0 Hz), 53.31 (d, *J* = 7.2 Hz), 49.89 (d, *J* = 138.3 Hz), 20.98.

$^{31}\text{P}$  NMR (162 MHz,  $\text{CDCl}_3$ )  $\delta$  27.88.

HRMS (ESI) Calcd. for  $\text{C}_{17}\text{H}_{21}\text{O}_3\text{P}$   $[\text{M}+\text{Na}]^+$ : 327.1121, found 327.1123.

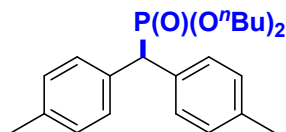

**3bc**

Yellowish liquid.  $^1\text{H}$  NMR (400 MHz,  $\text{CDCl}_3$ )  $\delta$  7.39 (d,  $J = 6.7$  Hz, 4H), 7.10 (d,  $J = 7.9$  Hz, 4H), 4.36 (d,  $J = 25.1$  Hz, 1H), 3.96 – 3.84 (m, 2H), 3.82 – 3.70 (m, 2H), 2.29 (s, 6H), 1.54 – 1.36 (m, 4H), 1.32 – 1.16 (m, 5H), 0.81 (t,  $J = 7.4$  Hz, 6H).

$^{13}\text{C}$  NMR (101 MHz,  $\text{CDCl}_3$ )  $\delta$  136.50 (d,  $J = 2.3$  Hz), 134.03 (d,  $J = 5.2$  Hz), 129.22, 129.14, 66.15 (d,  $J = 7.3$  Hz), 50.34 (d,  $J = 138.4$  Hz), 32.37 (d,  $J = 5.9$  Hz), 20.93, 18.51, 13.46.

$^{31}\text{P}$  NMR (162 MHz,  $\text{CDCl}_3$ )  $\delta$  25.41.

HRMS (ESI) Calcd. for  $\text{C}_{23}\text{H}_{33}\text{O}_3\text{P}$   $[\text{M}+\text{Na}]^+$ : 411.2060, found 411.2058.

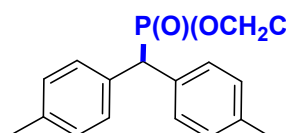

**3bd**

Yellowish liquid.  $^1\text{H}$  NMR (400 MHz,  $\text{CDCl}_3$ )  $\delta$  7.38 (d,  $J = 8.0$ , 4H), 7.14 (d,  $J = 7.9$  Hz, 4H), 4.54 (d,  $J = 26.4$  Hz, 1H), 4.40 – 4.20 (m, 2H), 4.01 – 3.79 (m, 2H), 2.31 (s, 6H).

$^{13}\text{C}$  NMR (101 MHz,  $\text{CDCl}_3$ )  $\delta$  137.59 (d,  $J = 2.5$  Hz), 131.78 (d,  $J = 5.3$  Hz), 129.61 (d,  $J = 1.4$  Hz), 129.06 (d,  $J = 8.6$  Hz), 122.42 (qd,  $J_{\text{C-F}} = 277.6$ ,  $J_{\text{C-P}} = 7.9$  Hz), 62.51 (qd,  $J_{\text{C-P}} = 38.0$ ,  $J_{\text{C-P}} = 6.5$  Hz), 50.09 (d,  $J = 139.1$  Hz), 20.95.

$^{31}\text{P}$  NMR (162 MHz,  $\text{CDCl}_3$ )  $\delta$  28.48.

HRMS (ESI) Calcd. for  $\text{C}_{19}\text{H}_{19}\text{F}_6\text{O}_3\text{P}$   $[\text{M}+\text{Na}]^+$ : 463.0868, found 463.0870.

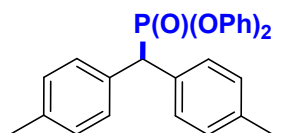

**3be**

White solid. mp 169-171 °C.  $^1\text{H}$  NMR (400 MHz,  $\text{CDCl}_3$ )  $\delta$  7.47 (d,  $J = 6.5$  Hz, 4H), 7.27 – 6.99 (m, 10H), 6.85 (d,  $J = 8.4$  Hz, 4H), 4.73 (d,  $J = 25.5$  Hz, 1H), 2.31 (s, 6H).

$^{13}\text{C}$  NMR (101 MHz,  $\text{CDCl}_3$ )  $\delta$  150.49 (d,  $J = 9.9$  Hz), 137.09 (d,  $J = 2.4$  Hz), 132.85 (d,  $J = 5.3$  Hz), 129.44, 129.42 (d,  $J = 1.8$  Hz), 129.36, 124.85, 120.58 (d,  $J = 4.2$  Hz), 50.45 (d,  $J = 139.5$  Hz), 21.00.

$^{31}\text{P}$  NMR (162 MHz,  $\text{CDCl}_3$ )  $\delta$  18.40.

**HRMS (ESI)** Calcd. for  $C_{27}H_{25}O_3P$   $[M+Na]^+$ : 451.1434, found 451.1487.

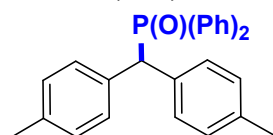

**3bf**

White solid. mp 258-260 °C.  $^1H$  NMR (400 MHz,  $CDCl_3$ )  $\delta$  7.70 – 7.53 (m, 4H), 7.45 – 7.27 (m, 10H), 6.97 (d,  $J$  = 8.0 Hz, 4H), 4.69 (d,  $J$  = 9.0 Hz, 1H), 2.21 (s, 6H).

$^{13}C$  NMR (101 MHz,  $CDCl_3$ )  $\delta$  136.35 (d,  $J$  = 1.7 Hz), 134.28 (d,  $J$  = 4.6 Hz), 132.73 (d,  $J$  = 97.7 Hz), 131.31, 131.23, 129.52 (d,  $J$  = 6.8 Hz), 129.14, 128.15 (d,  $J$  = 11.5 Hz), 52.51 (d,  $J$  = 66.6 Hz), 20.96.

$^{31}P$  NMR (162 MHz,  $CDCl_3$ )  $\delta$  31.00.

**HRMS (ESI)** Calcd. for  $C_{27}H_{25}OP$   $[M+Na]^+$ : 419.1535, found 419.1533.

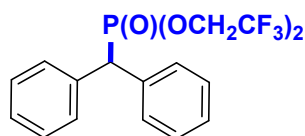

**3bg**

Yellowish solid. mp 88-90 °C.  $^1H$  NMR (400 MHz,  $CDCl_3$ )  $\delta$  7.51 (d,  $J$  = 7.3 Hz, 4H), 7.39 – 7.26 (m, 6H), 4.62 (d,  $J$  = 26.4 Hz, 1H), 4.37 – 4.19 (m, 2H), 3.99 – 3.82 (m, 2H).

$^{13}C$  NMR (101 MHz,  $CDCl_3$ )  $\delta$  134.60 (d,  $J$  = 5.4 Hz), 128.96 (d,  $J$  = 1.4 Hz), 127.91 (d,  $J$  = 2.3 Hz), 122.35 (qd,  $J_{C-F}$  = 277.5,  $J_{C-P}$  = 7.9 Hz), 62.53 (qd,  $J_{C-F}$  = 38.0,  $J_{C-P}$  = 6.5 Hz), 50.89 (d,  $J$  = 139.3 Hz).

$^{31}P$  NMR (162 MHz,  $CDCl_3$ )  $\delta$  28.06.

**HRMS (ESI)** Calcd. for  $C_{17}H_{15}F_6O_3P$   $[M+Na]^+$ : 435.0555, found 435.0559.

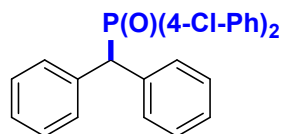

**3bh**

White solid. mp 248-250 °C.  $^1H$  NMR (400 MHz,  $CDCl_3$ )  $\delta$  7.57 – 7.45 (m, 8H), 7.30 (dd,  $J$  = 8.6, 2.4 Hz, 4H), 7.24 – 7.12 (m, 6H), 4.70 (d,  $J$  = 8.9 Hz, 1H).

$^{13}C$  NMR (101 MHz,  $CDCl_3$ )  $\delta$  138.19 (d,  $J$  = 3.4 Hz), 136.45 (d,  $J$  = 4.7 Hz), 132.55 (d,  $J$  = 9.5 Hz), 130.52 (d,  $J$  = 99.4 Hz), 129.63 (d,  $J$  = 6.8 Hz), 128.73, 128.62, 127.21 (d,  $J$  = 1.8 Hz), 53.34 (d,  $J$  = 67.1 Hz).

$^{31}P$  NMR (162 MHz,  $CDCl_3$ )  $\delta$  30.25.

**HRMS (ESI)** Calcd. for  $C_{25}H_{19}ClOP$   $[M+Na]^+$ : 459.0443, found 459.0440.

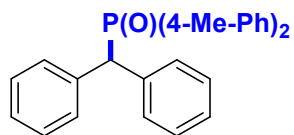

**3bi**

White solid. mp 264-266 °C.  $^1\text{H}$  NMR (400 MHz,  $\text{CDCl}_3$ )  $\delta$  7.57 – 7.50 (m, 8H), 7.26 – 7.14 (m, 10H), 4.76 (d,  $J = 9.0$  Hz, 1H), 2.35 (s, 6H).

$^{13}\text{C}$  NMR (101 MHz,  $\text{CDCl}_3$ )  $\delta$  141.60 (d,  $J = 2.7$  Hz), 137.43 (d,  $J = 4.7$  Hz), 131.24 (d,  $J = 9.0$  Hz), 129.79 (d,  $J = 6.7$  Hz), 128.96, 128.85, 128.39, 126.77 (d,  $J = 1.7$  Hz), 53.56 (d,  $J = 66.1$  Hz), 21.47.

$^{31}\text{P}$  NMR (162 MHz,  $\text{CDCl}_3$ )  $\delta$  31.49.

HRMS (ESI) Calcd. for  $\text{C}_{27}\text{H}_{25}\text{OP}$   $[\text{M}+\text{Na}]^+$ : 419.1535, found 419.1537.

## $^1\text{H}$ , $^{13}\text{C}$ and $^{31}\text{P}$ NMR and spectra of Products

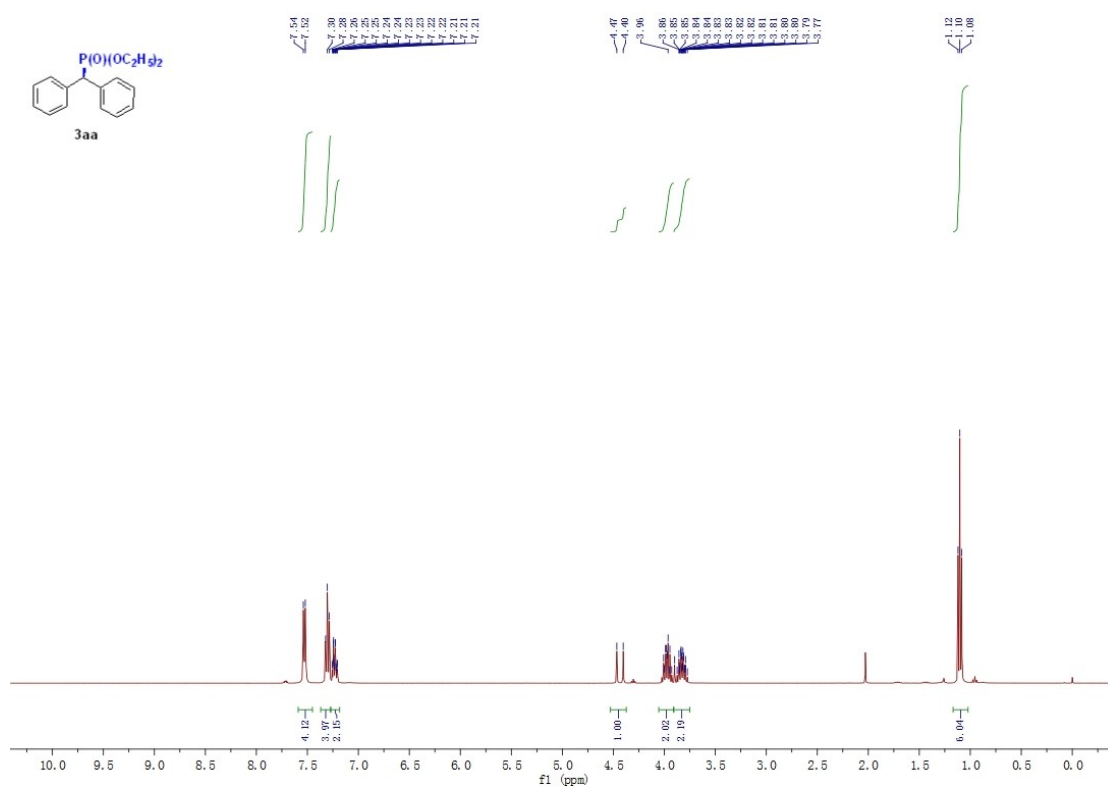



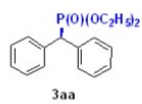

136.75  
 136.09  
 129.40  
 129.32  
 128.47  
 127.94  
 127.02

77.00  
 76.68  
 59.55  
 51.88  
 50.96

16.16  
16.10

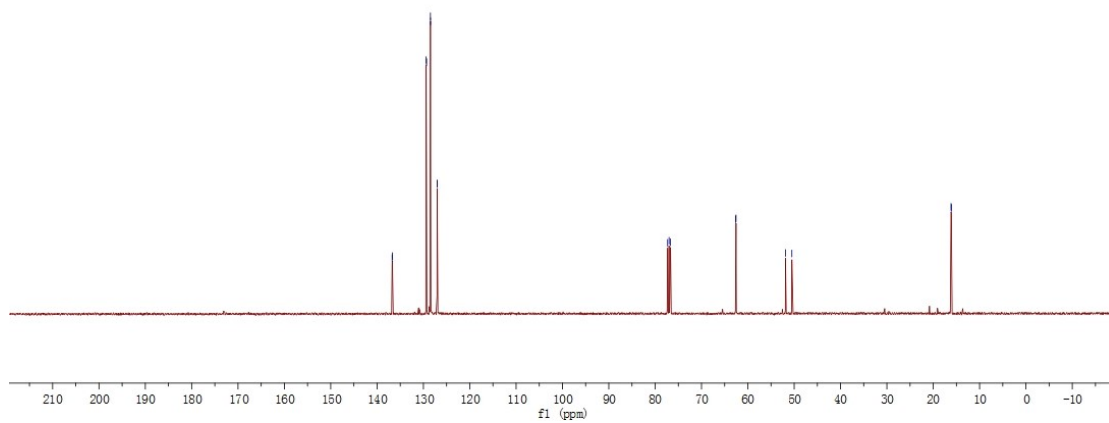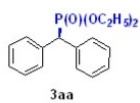

-25.07

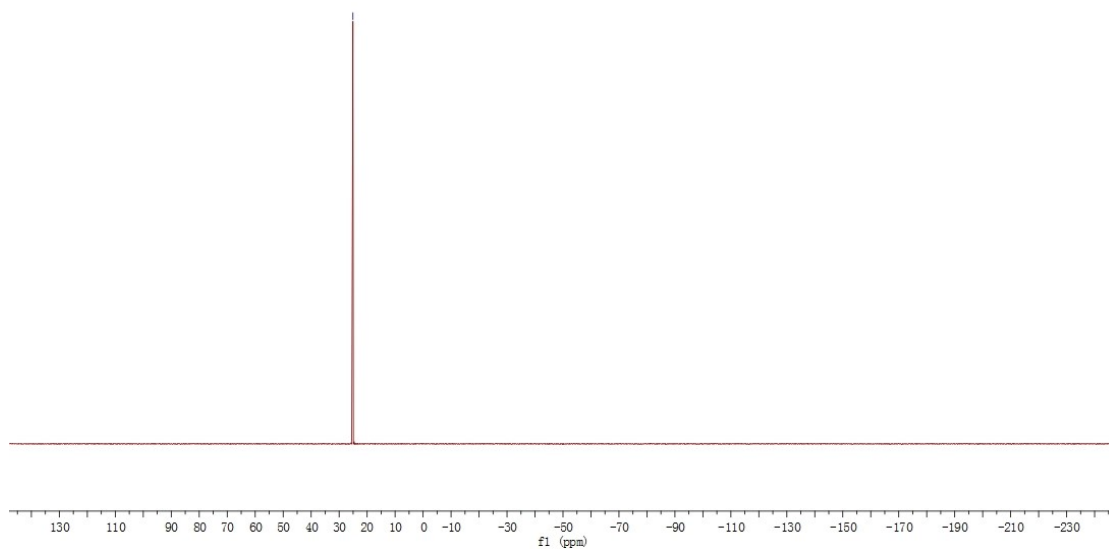

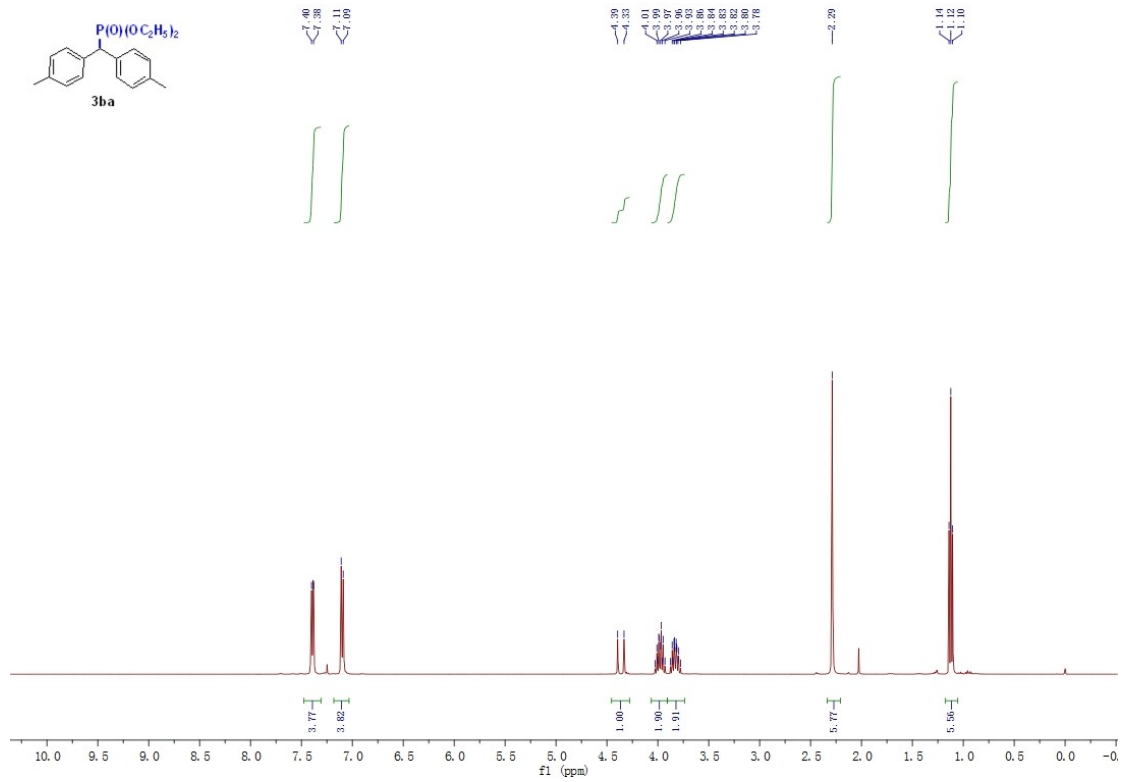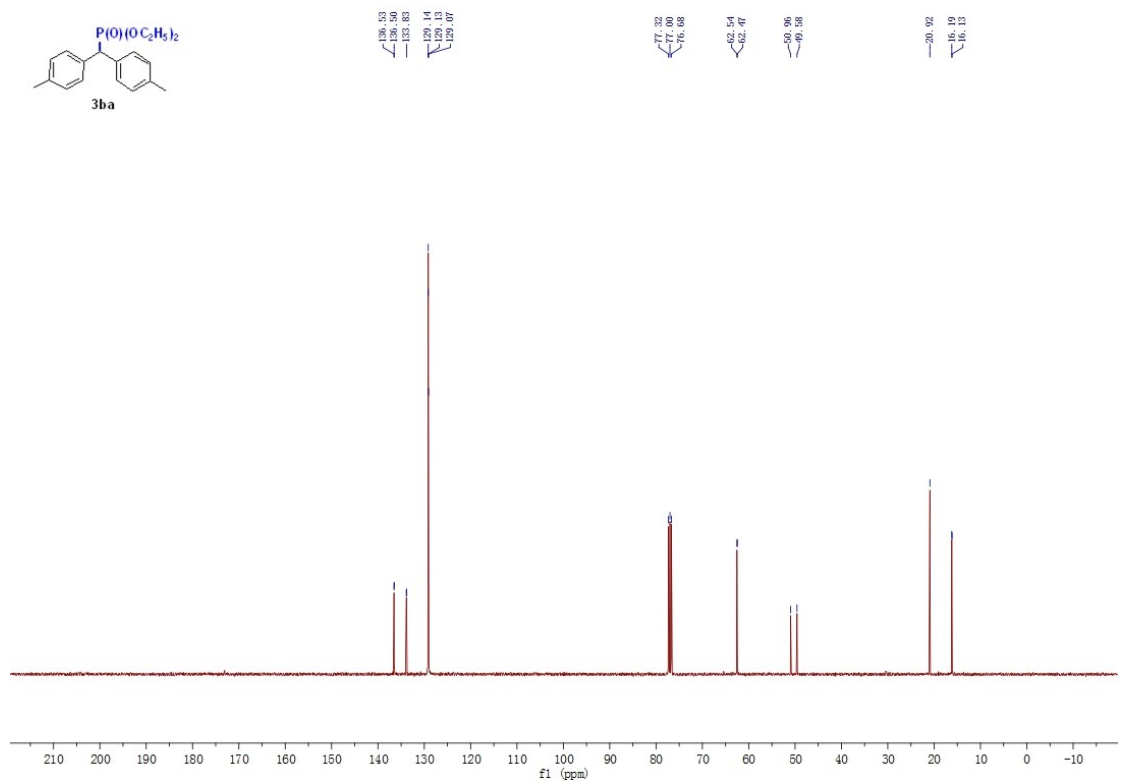

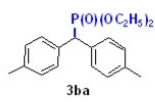

—25.57

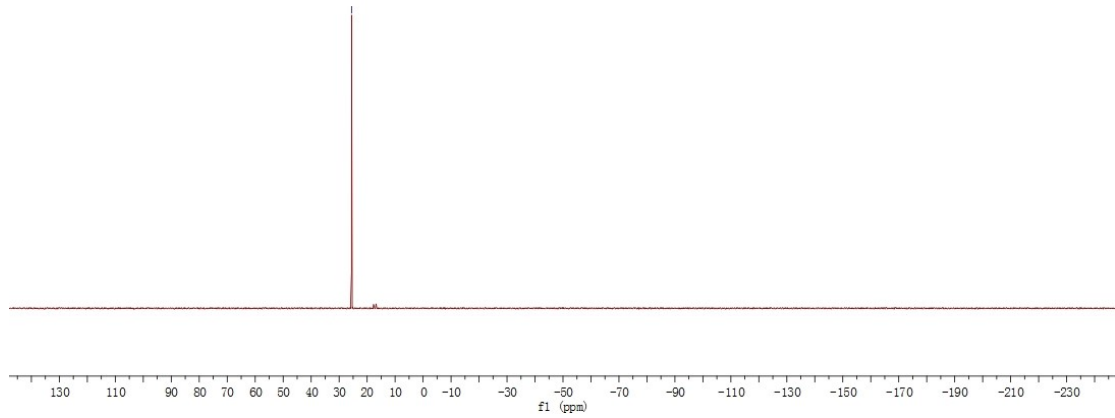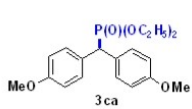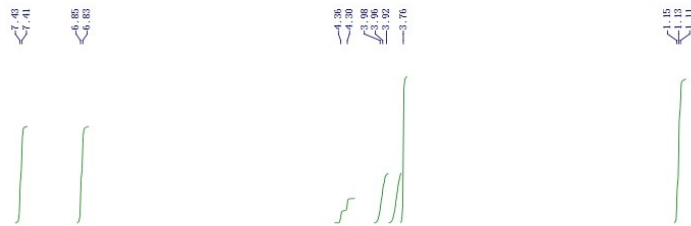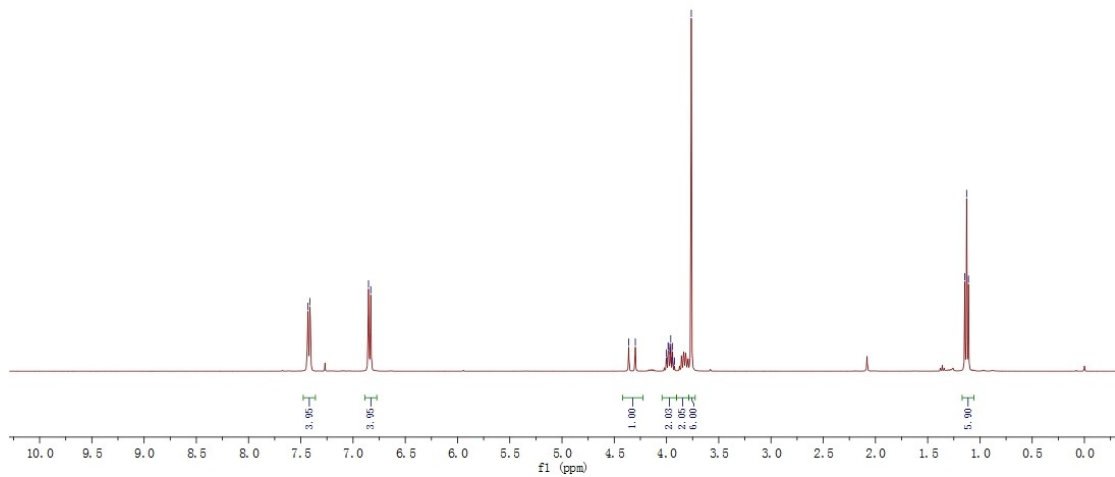

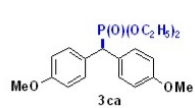

158.52  
158.50

130.24  
130.26

113.86  
113.85

77.02  
77.00  
76.98

62.50  
62.43

55.11

50.02  
48.64

16.24  
16.18

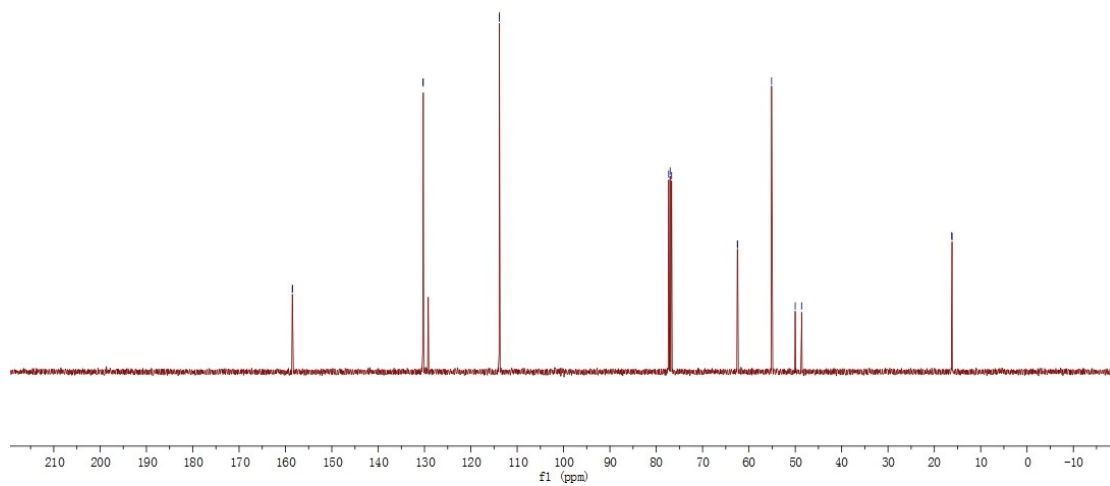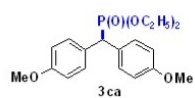

25.63

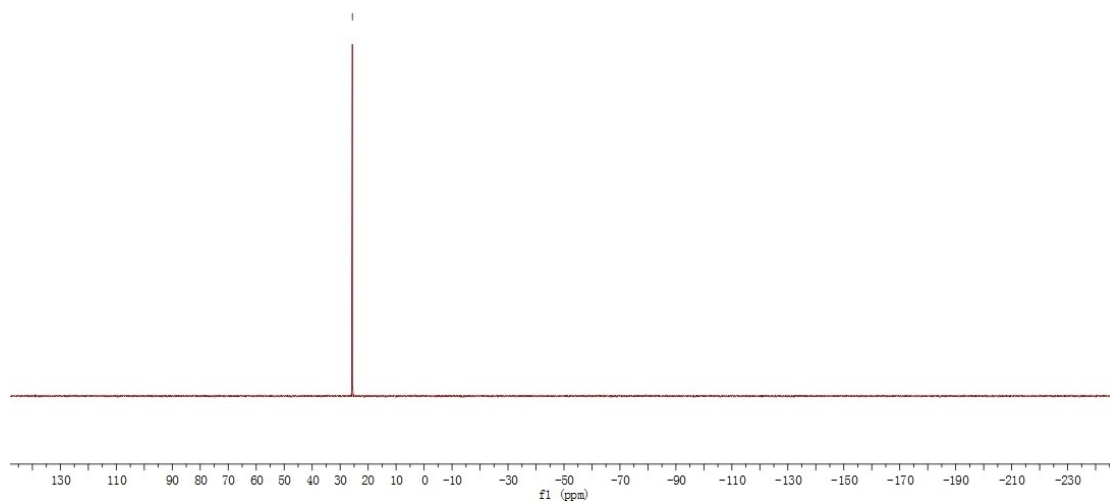

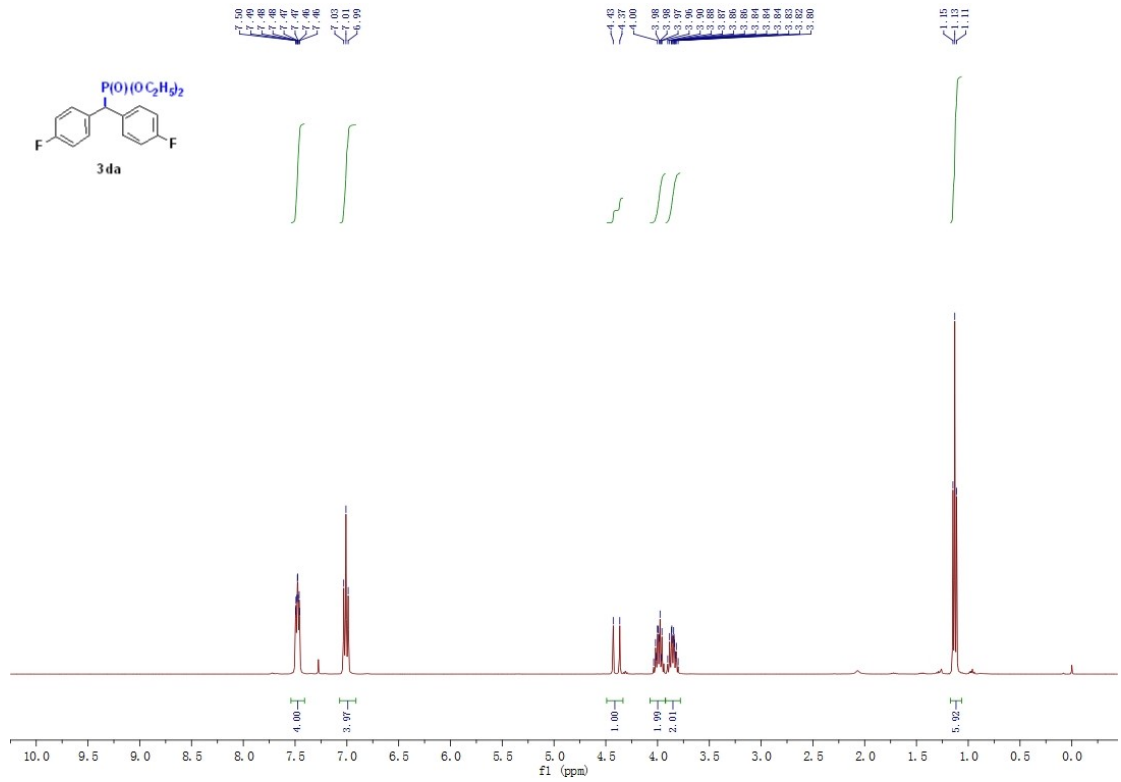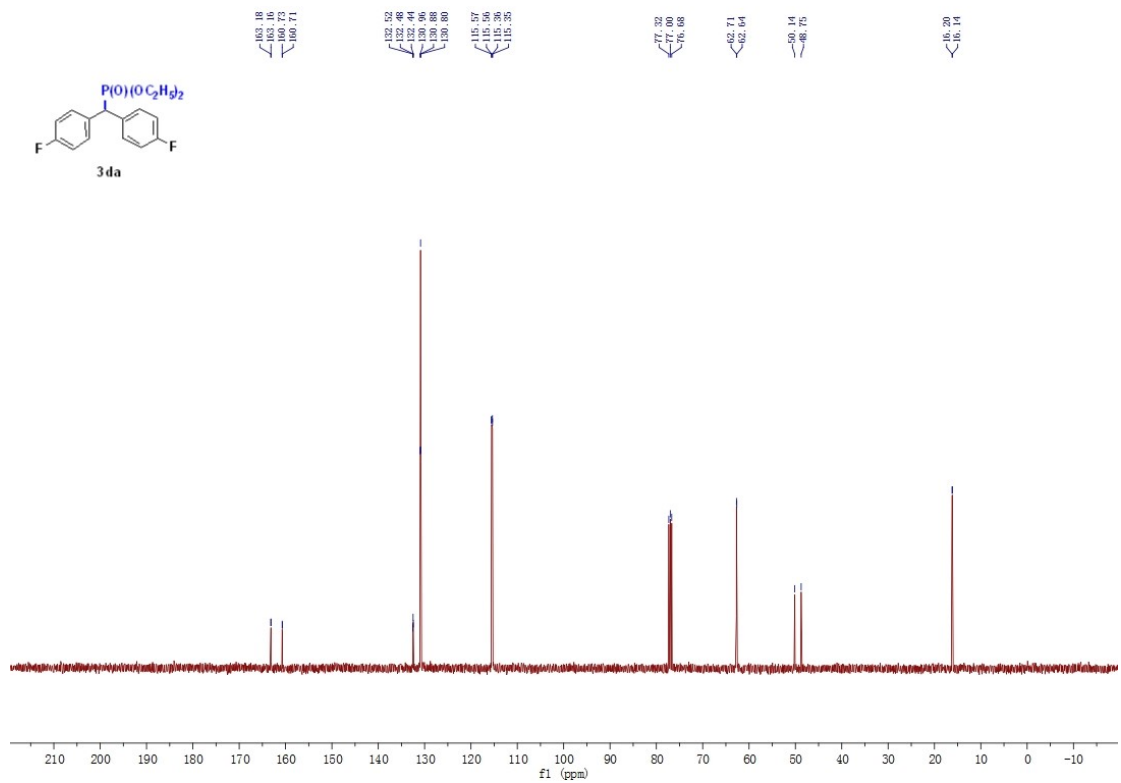

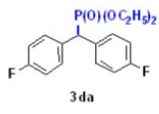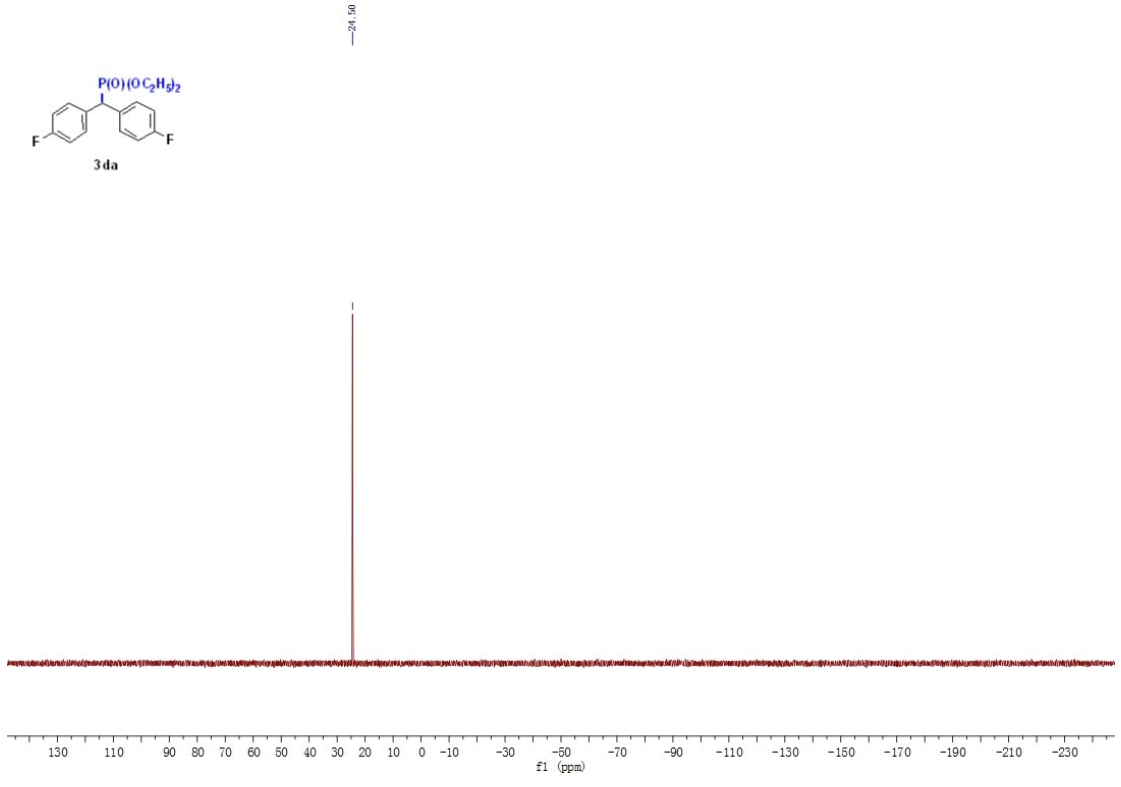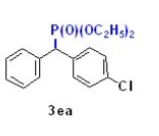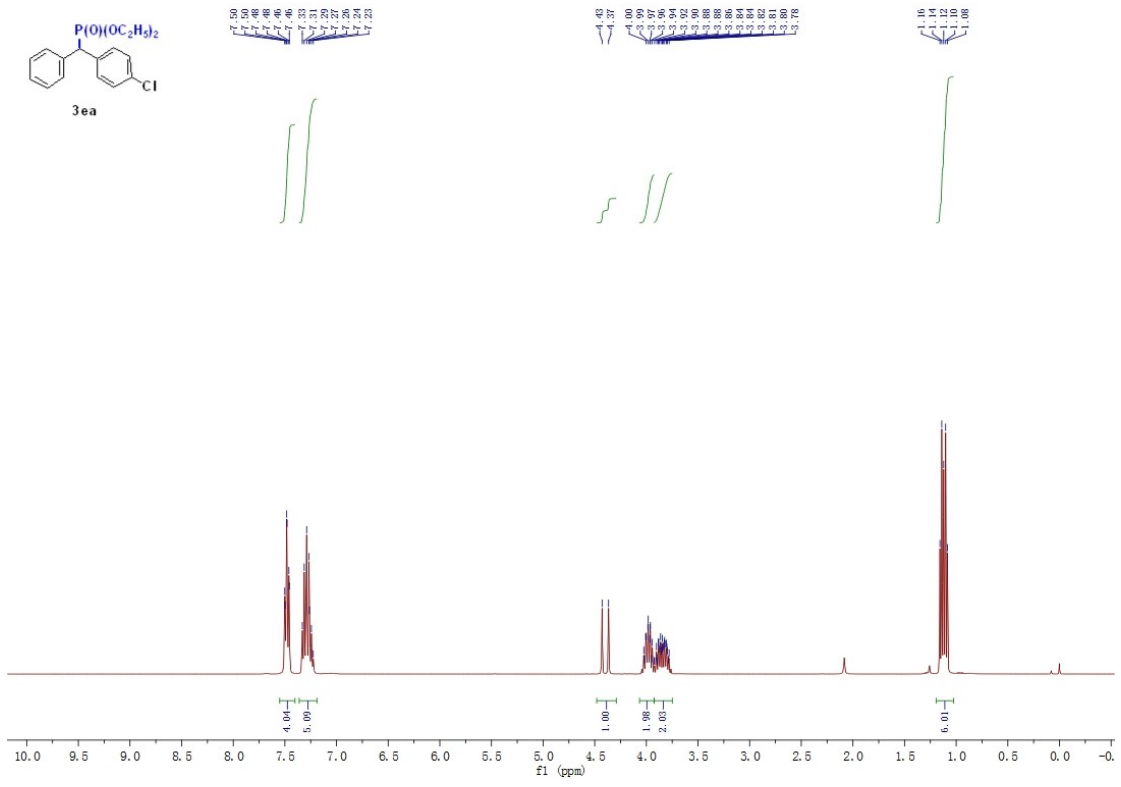

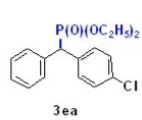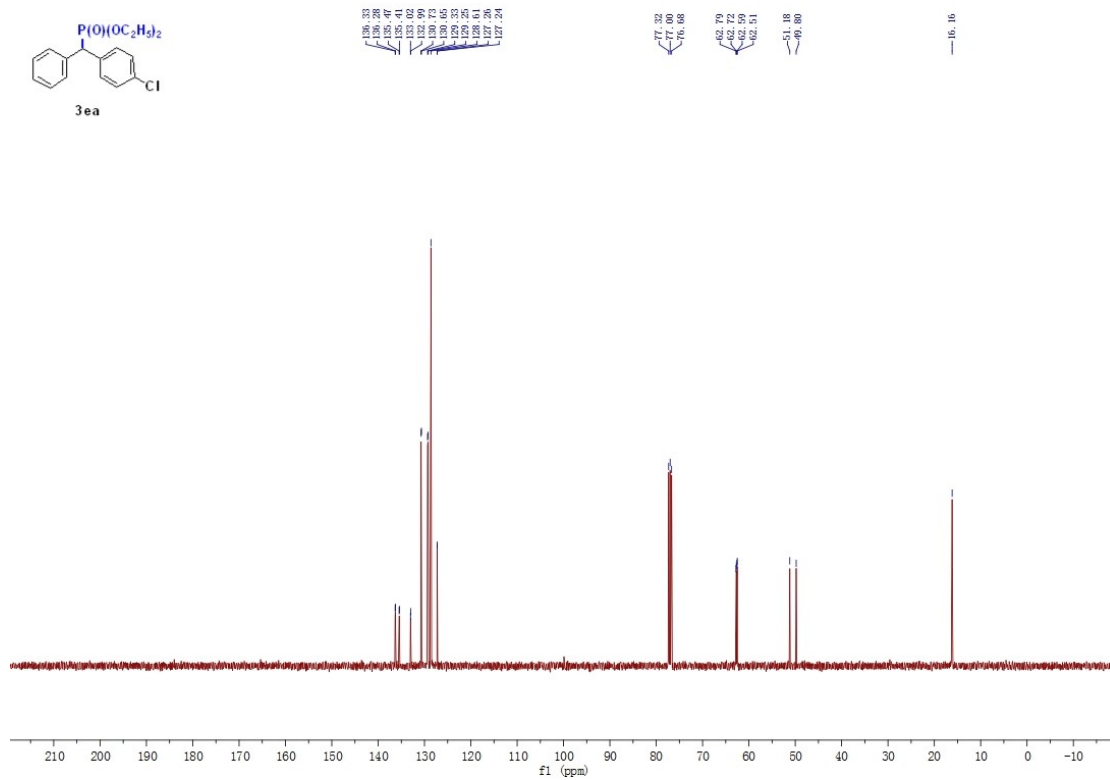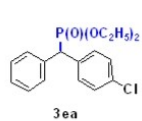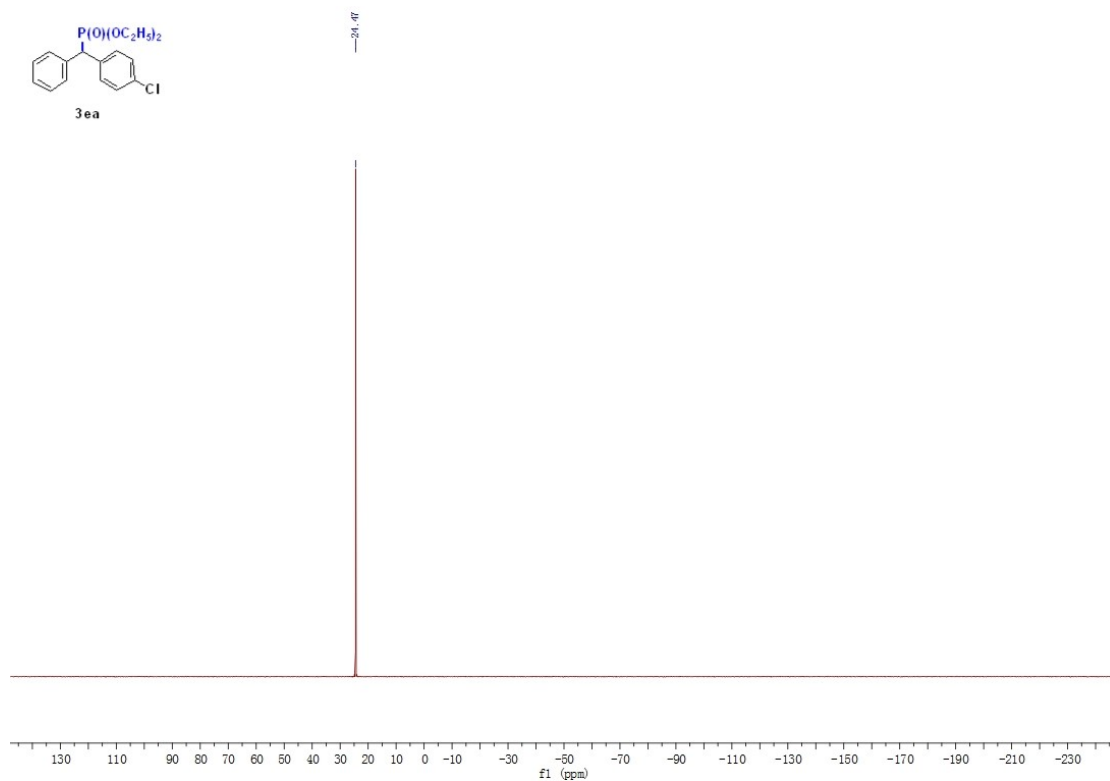

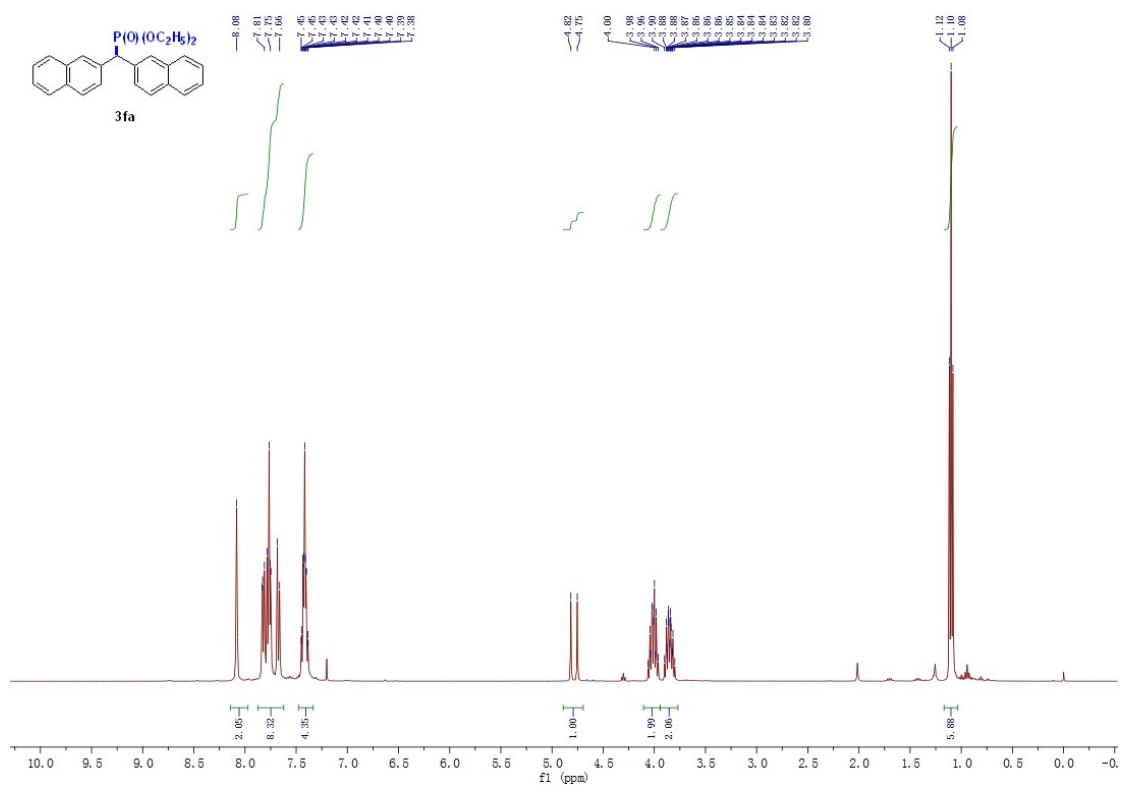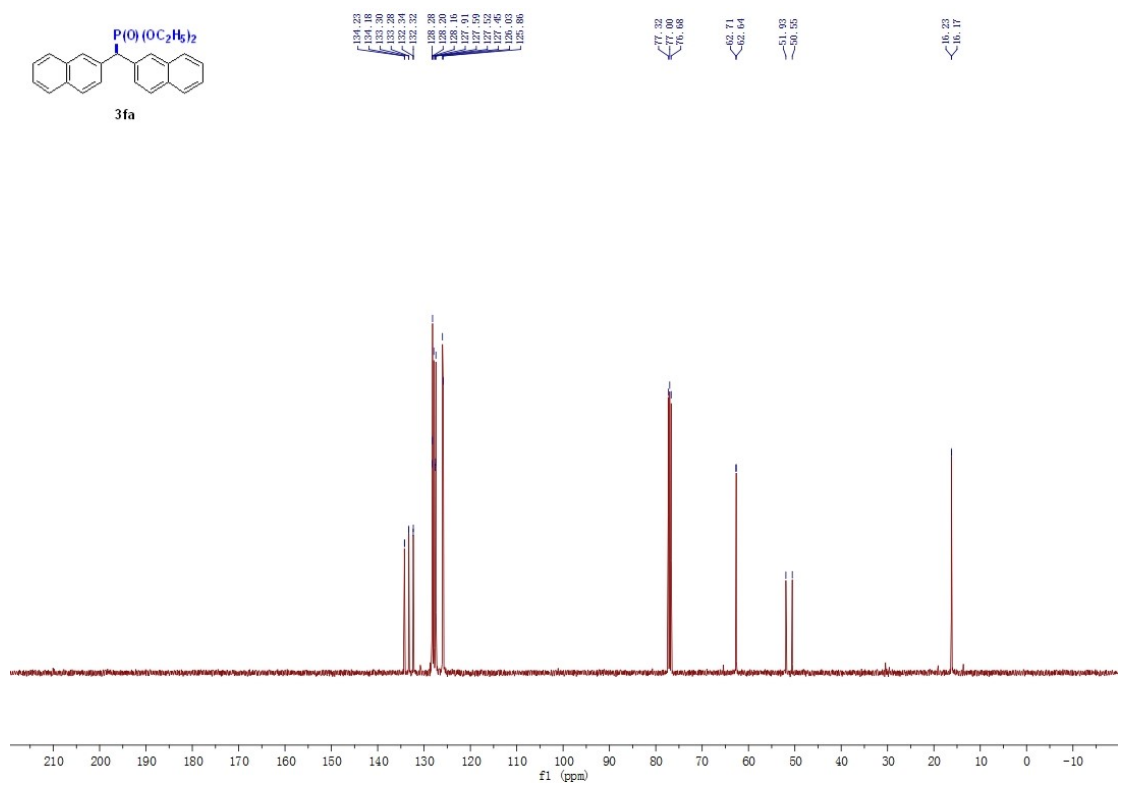





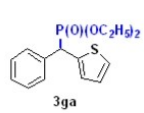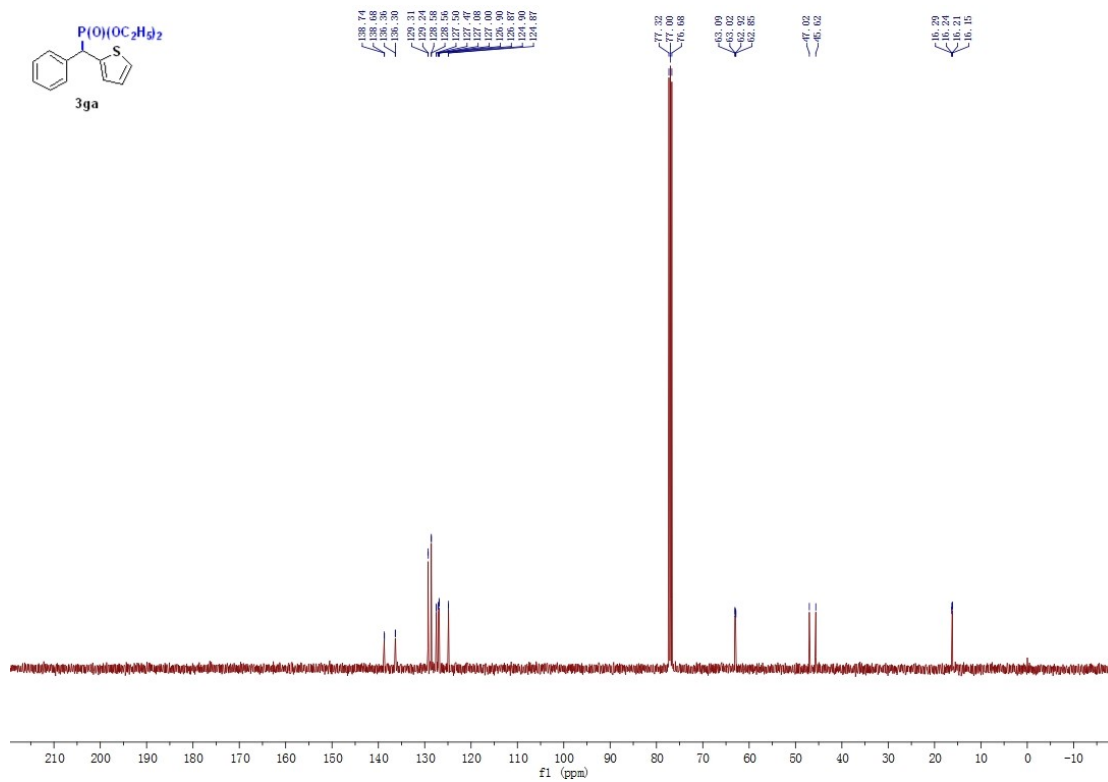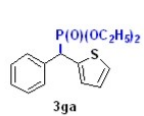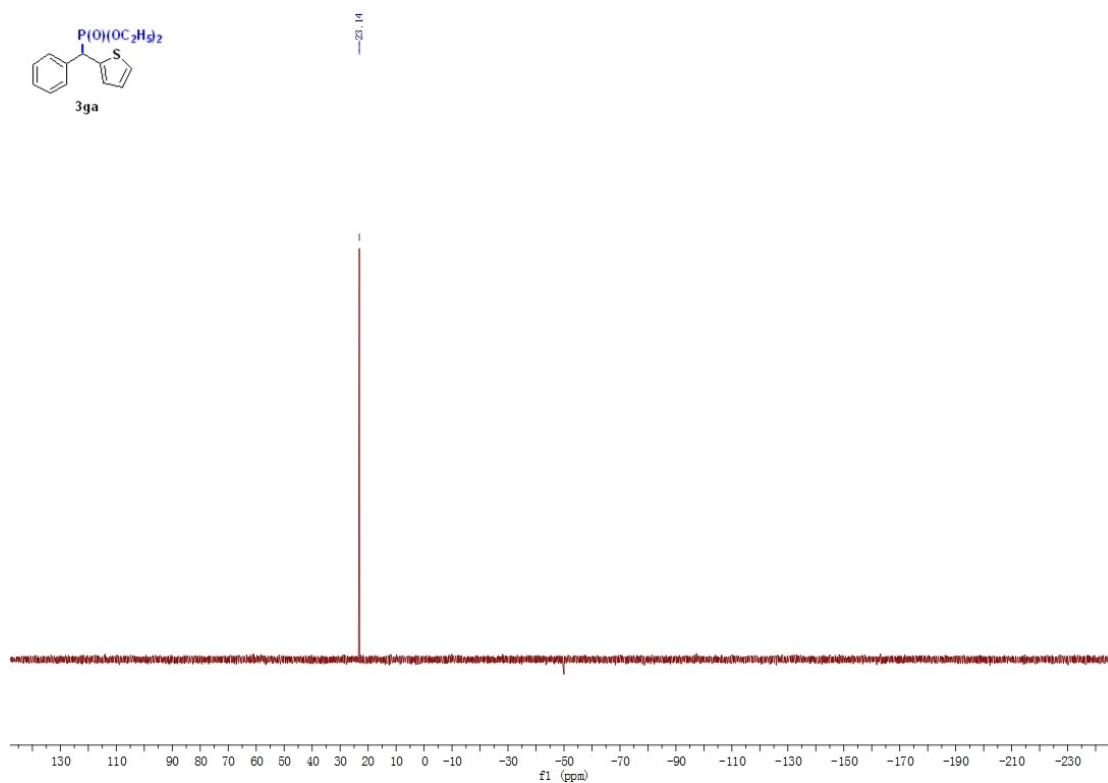

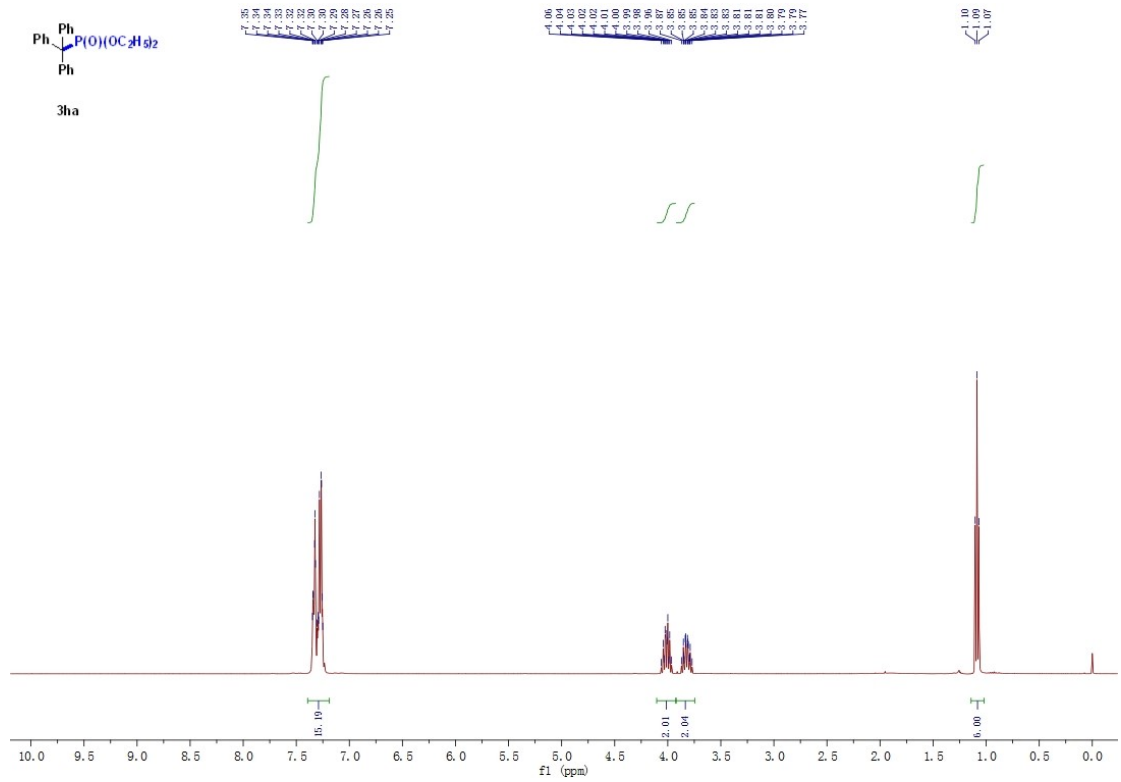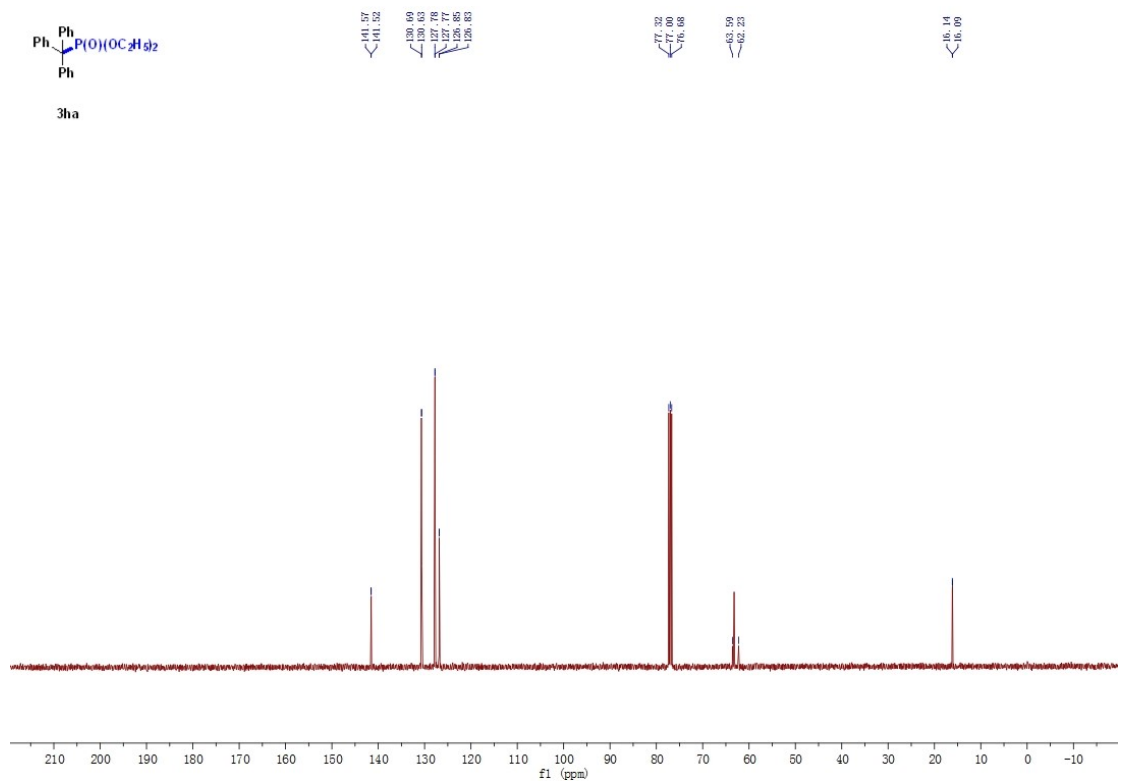

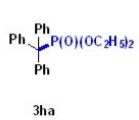

27.06

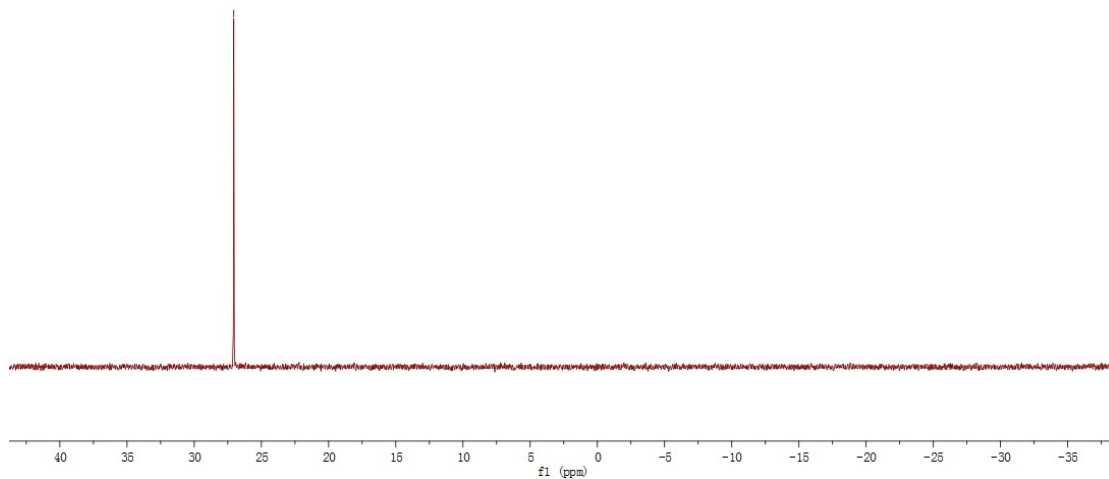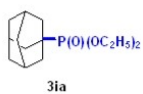

13.32, 12.12, 11.11, 10.08, 10.06

1.88, 1.91, 1.90, 1.89, 1.88, 1.72, 1.68, 1.33, 1.30

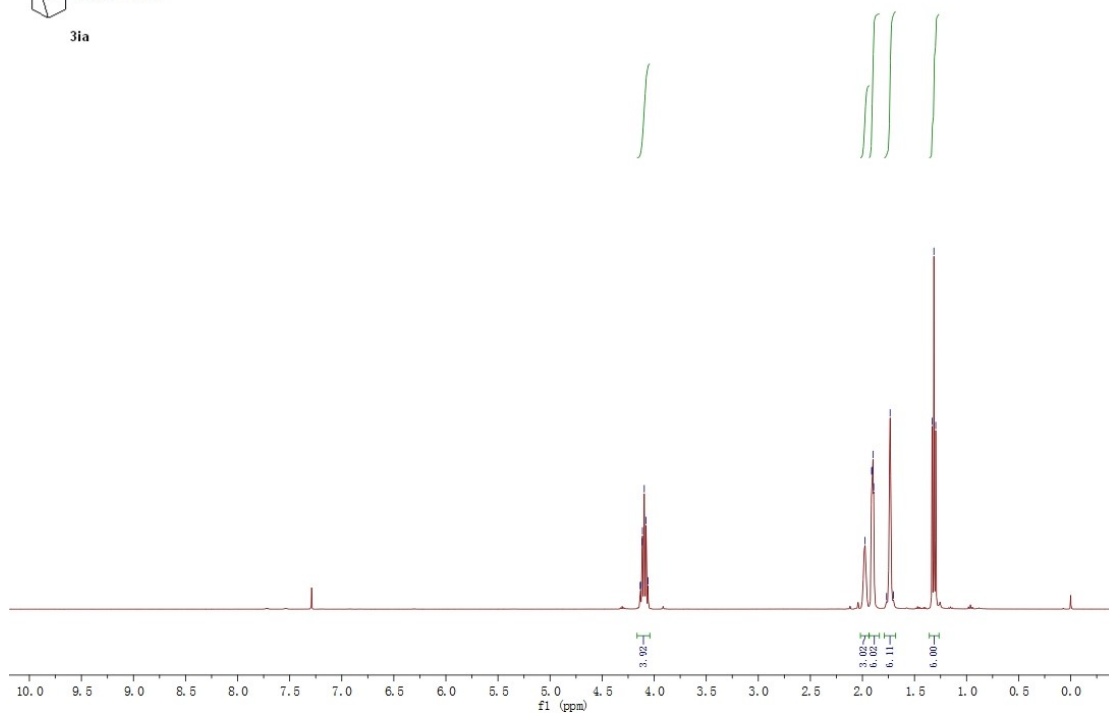

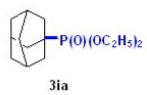

77.700  
77.688  
76.888  
61.51  
61.514  
36.51  
36.49  
35.38  
34.92  
33.46  
32.82  
16.55  
16.49

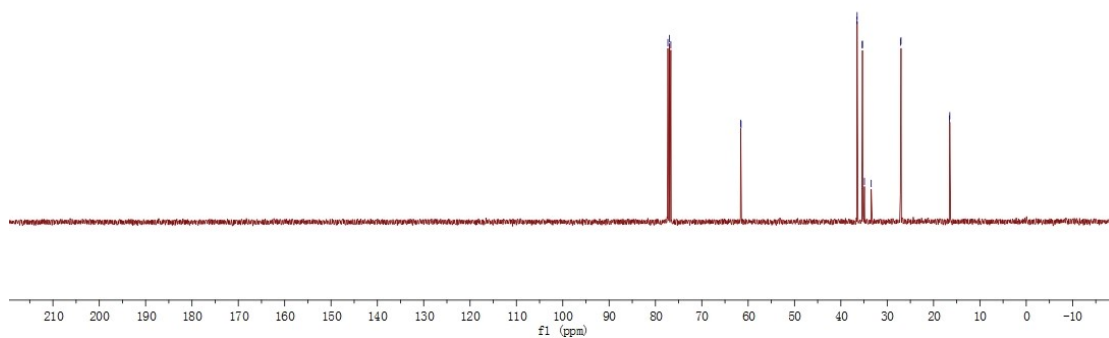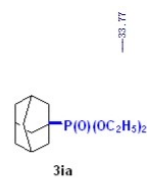

33.77

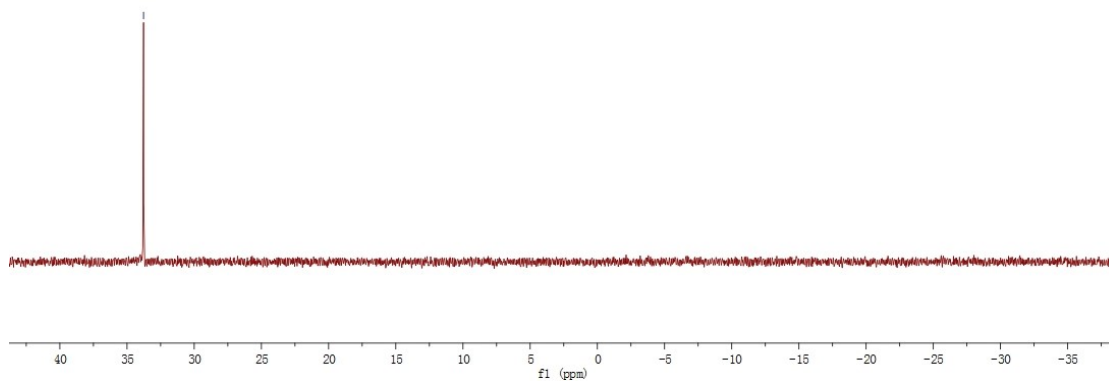

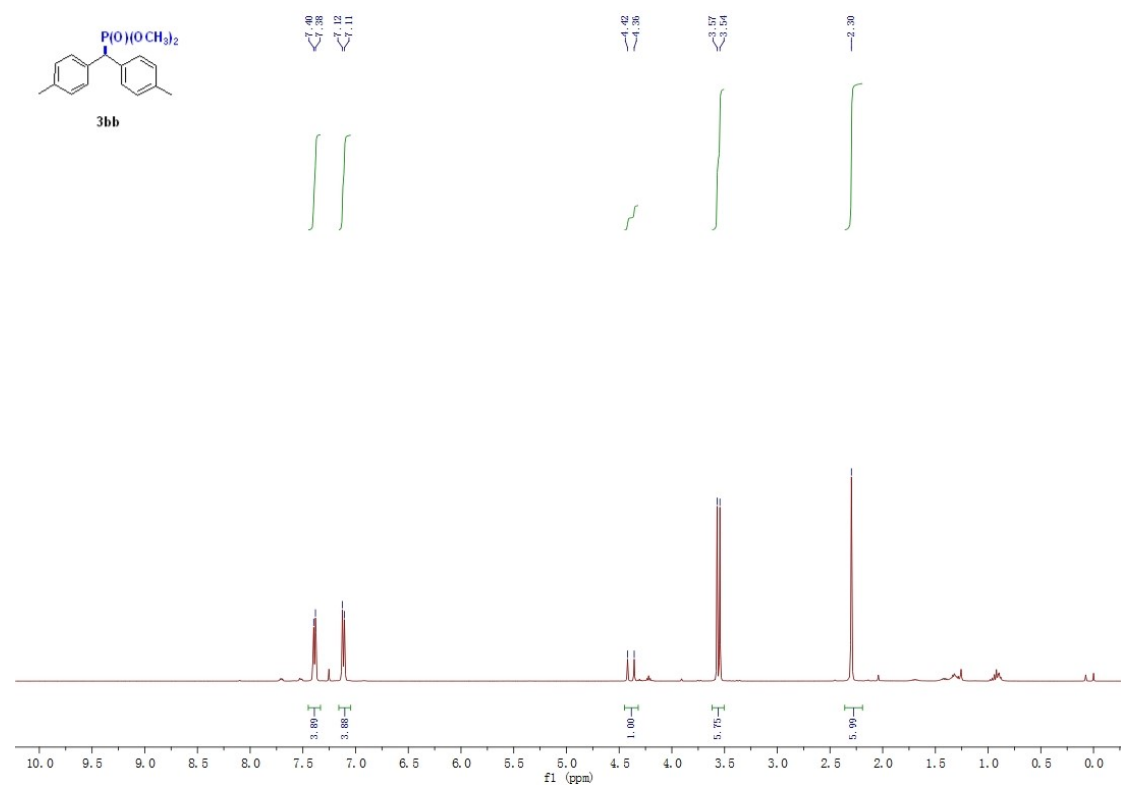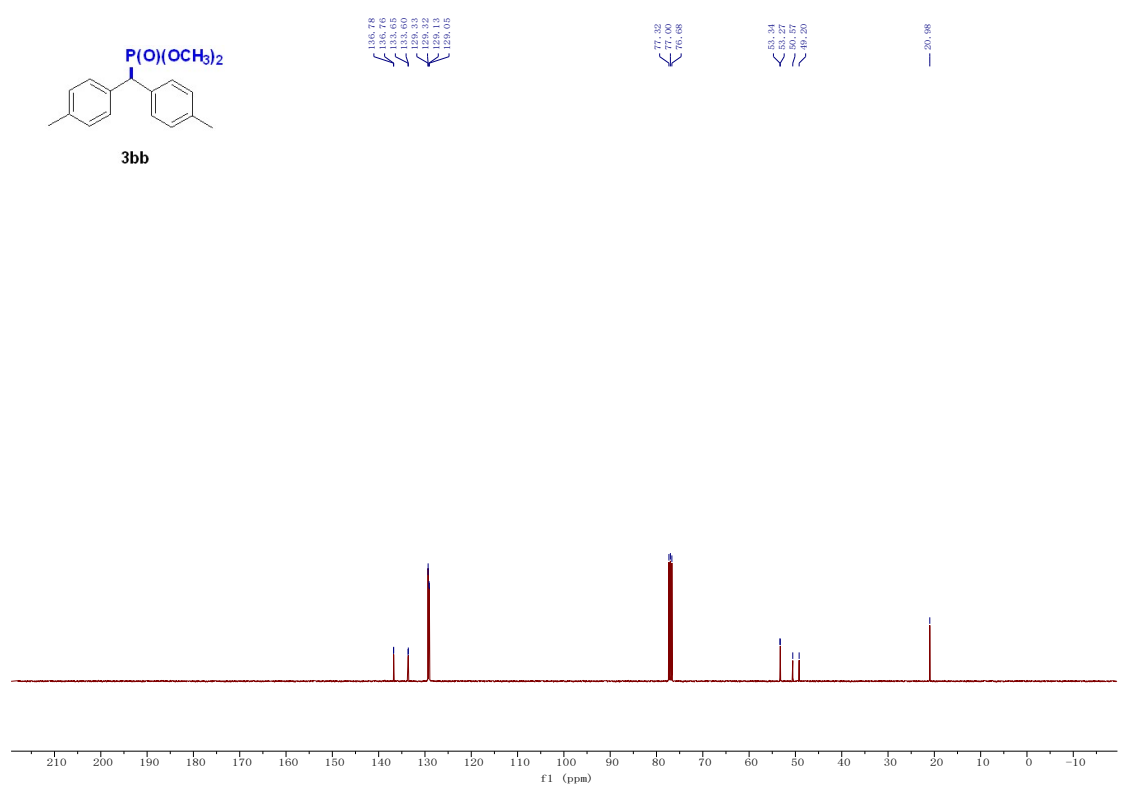

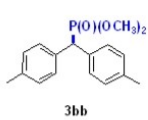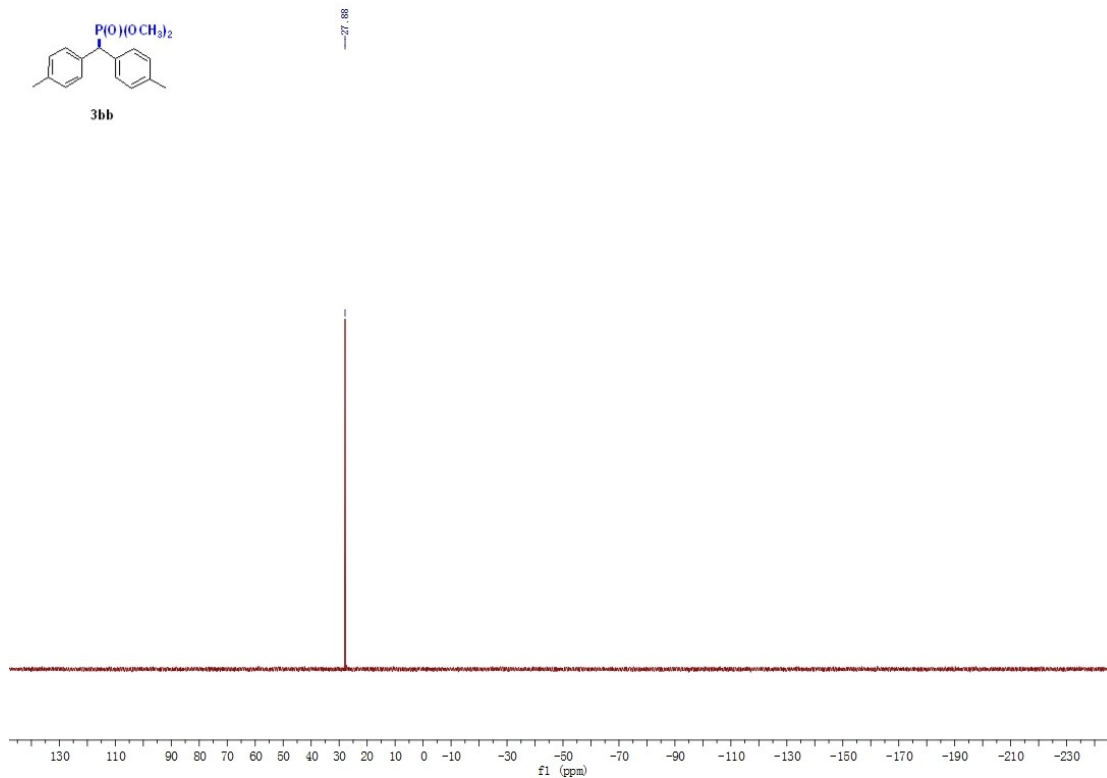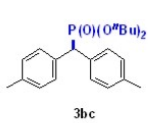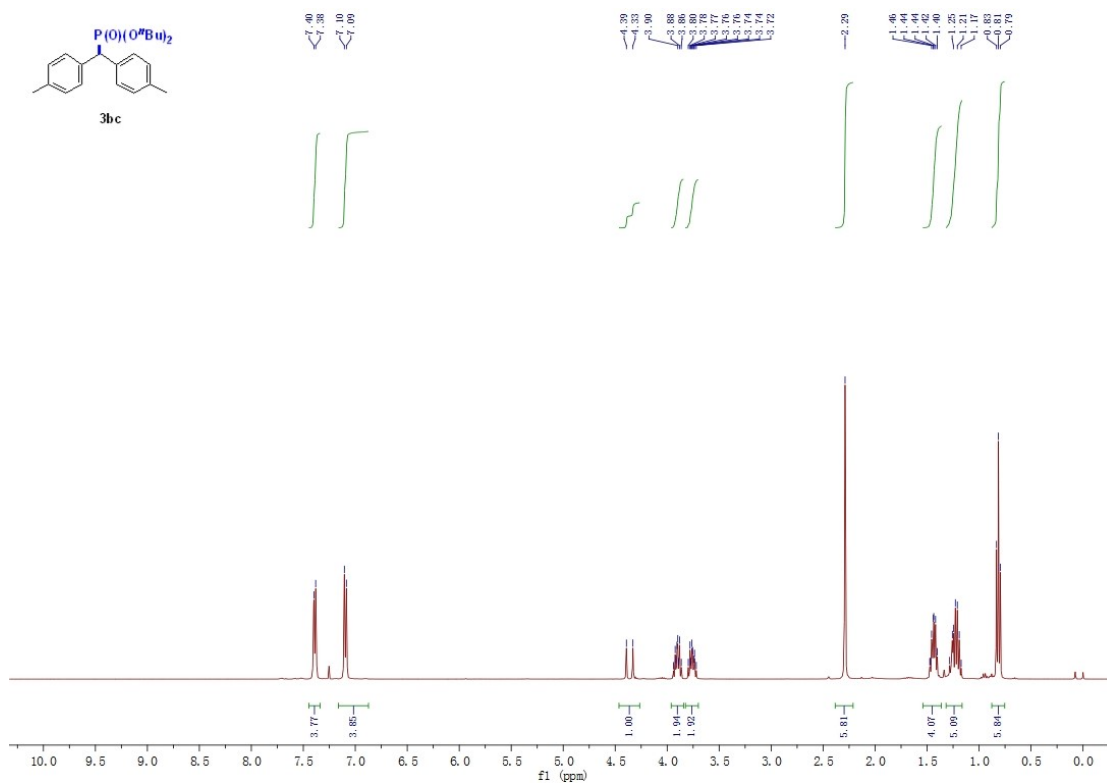

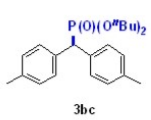

136.51  
 136.49  
 134.00  
 133.22  
 133.14

77.00  
 77.00  
 76.68  
 66.19  
 66.11

51.03  
 49.65

32.40  
 32.34

20.93  
 19.51  
 13.46

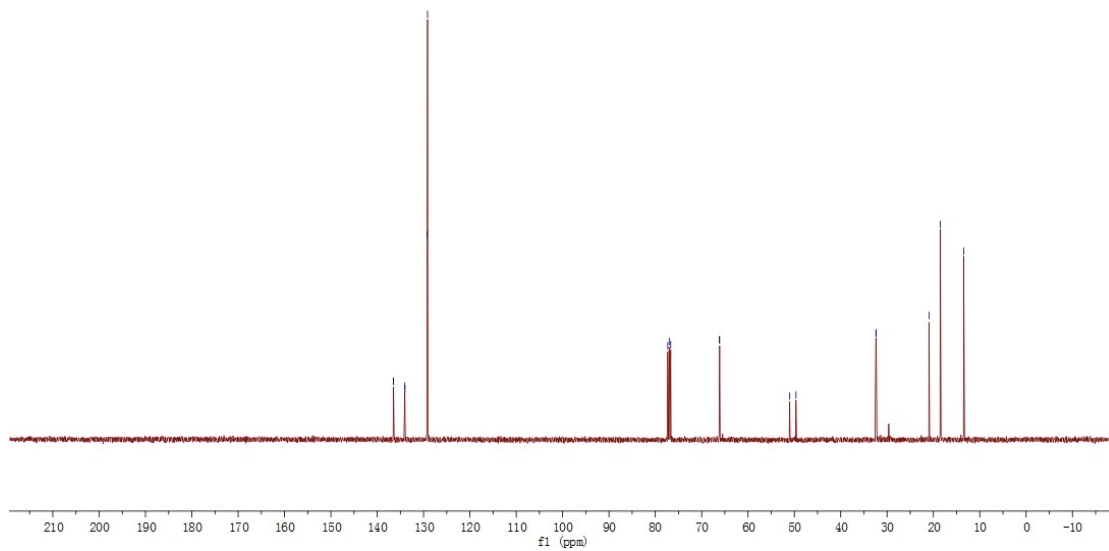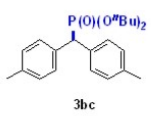

25.41

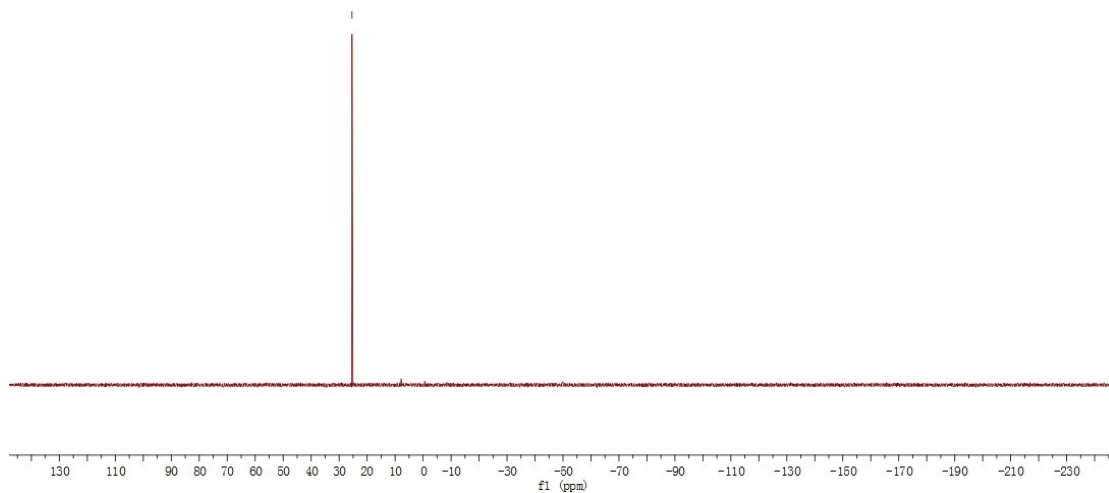



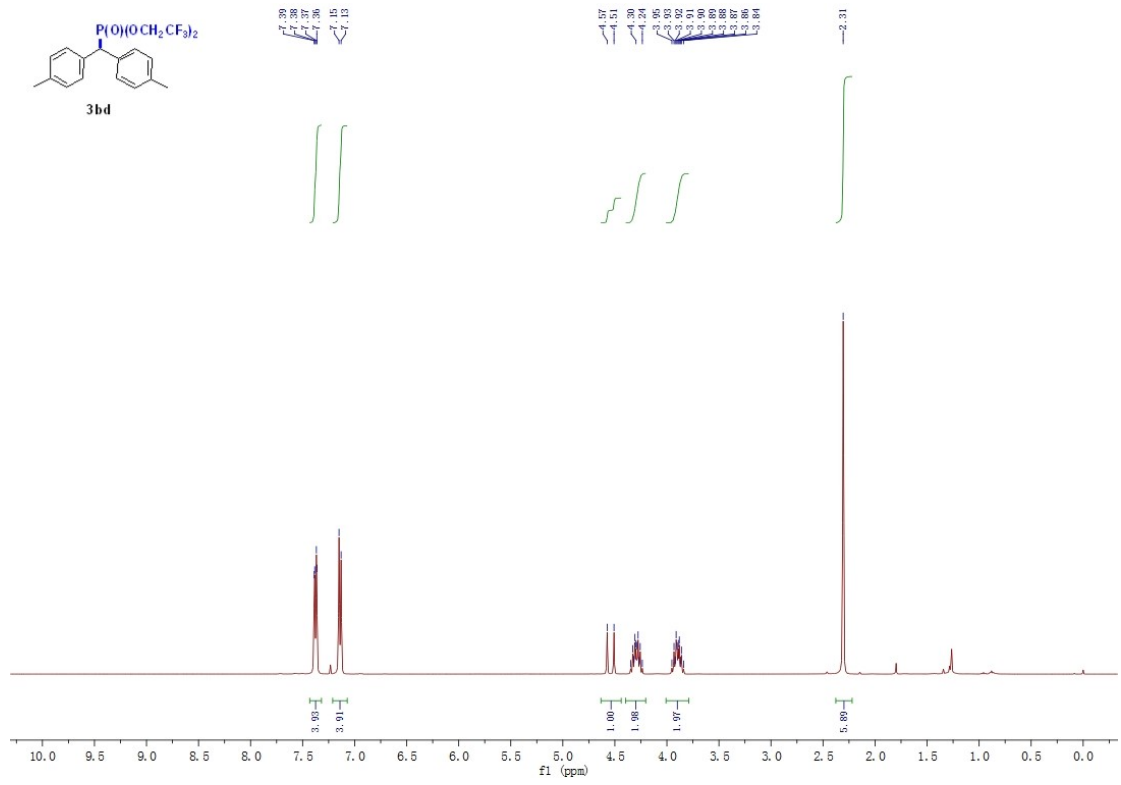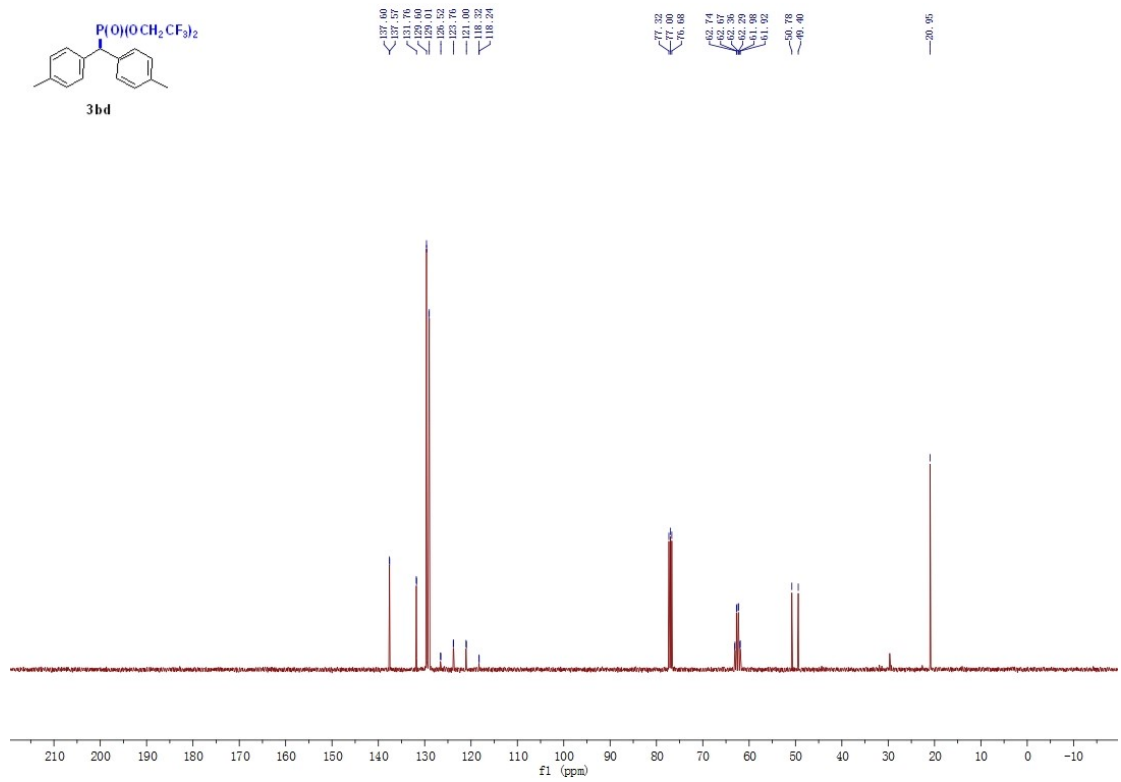

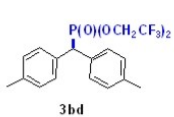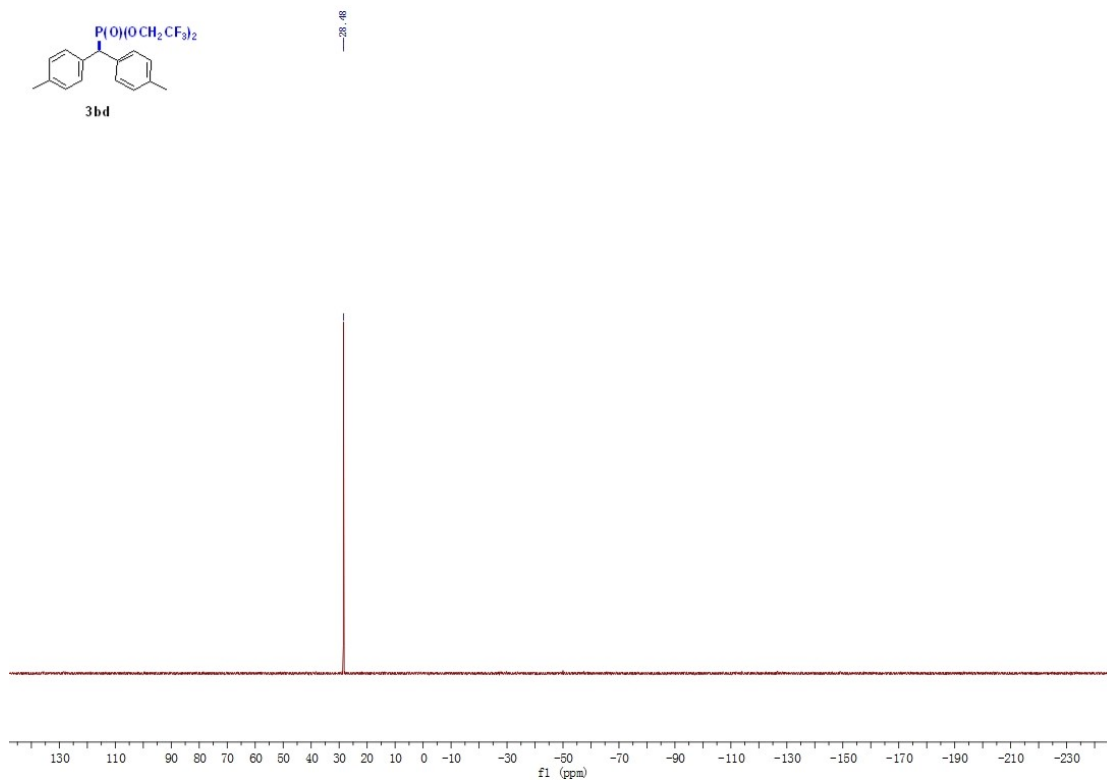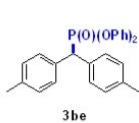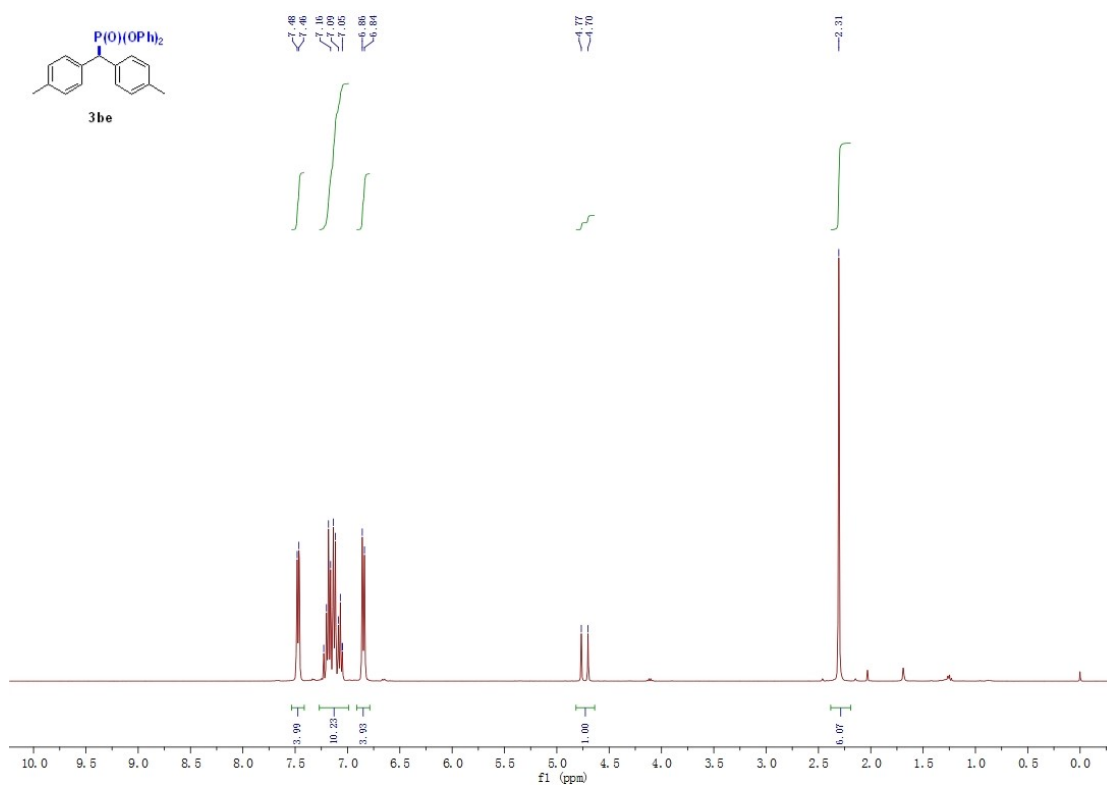

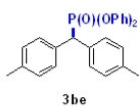

159.54  
 150.44  
 137.10  
 137.08  
 132.82  
 129.36  
 124.85  
 120.99  
 120.84

77.32  
 77.00  
 76.68

51.14  
 49.15

21.00

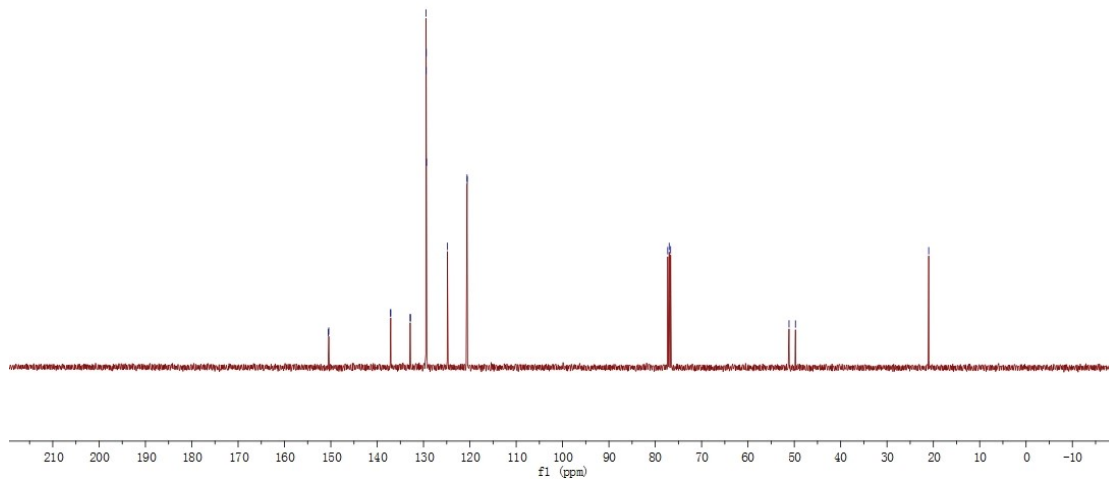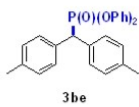

18.40

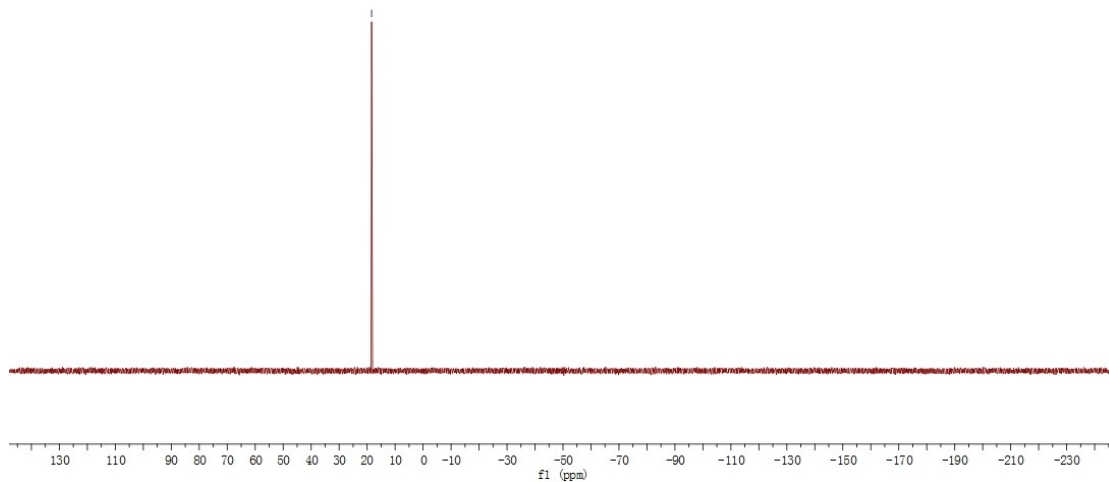

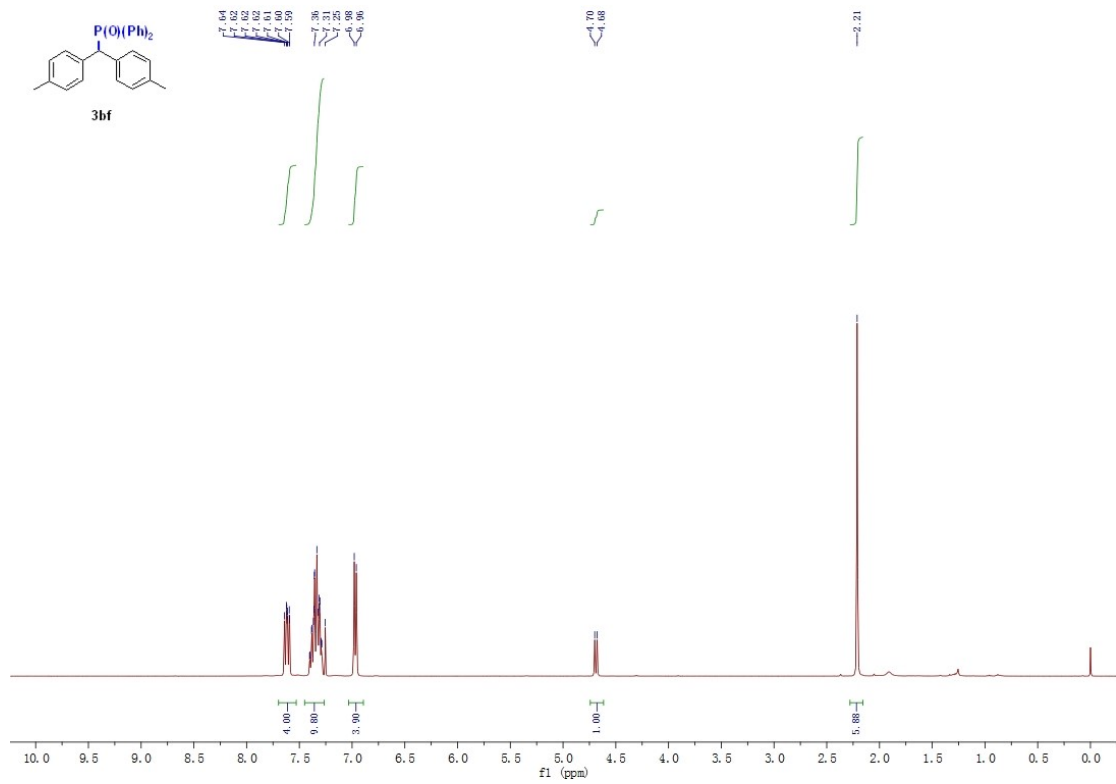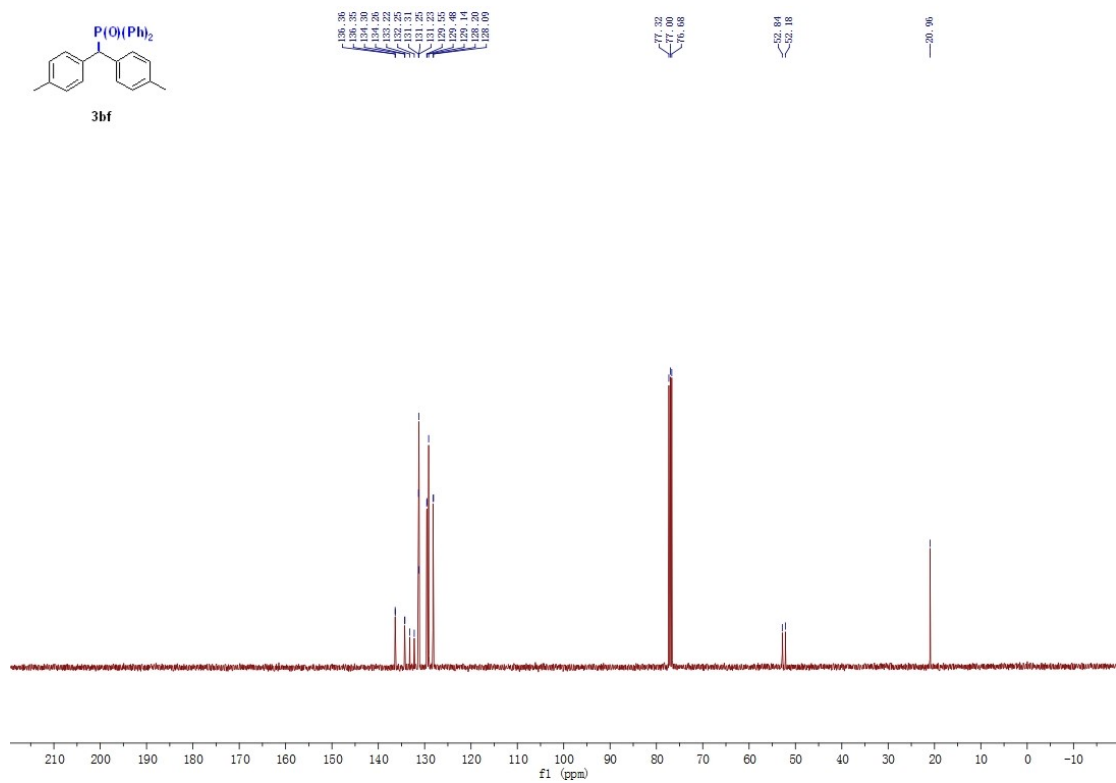

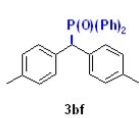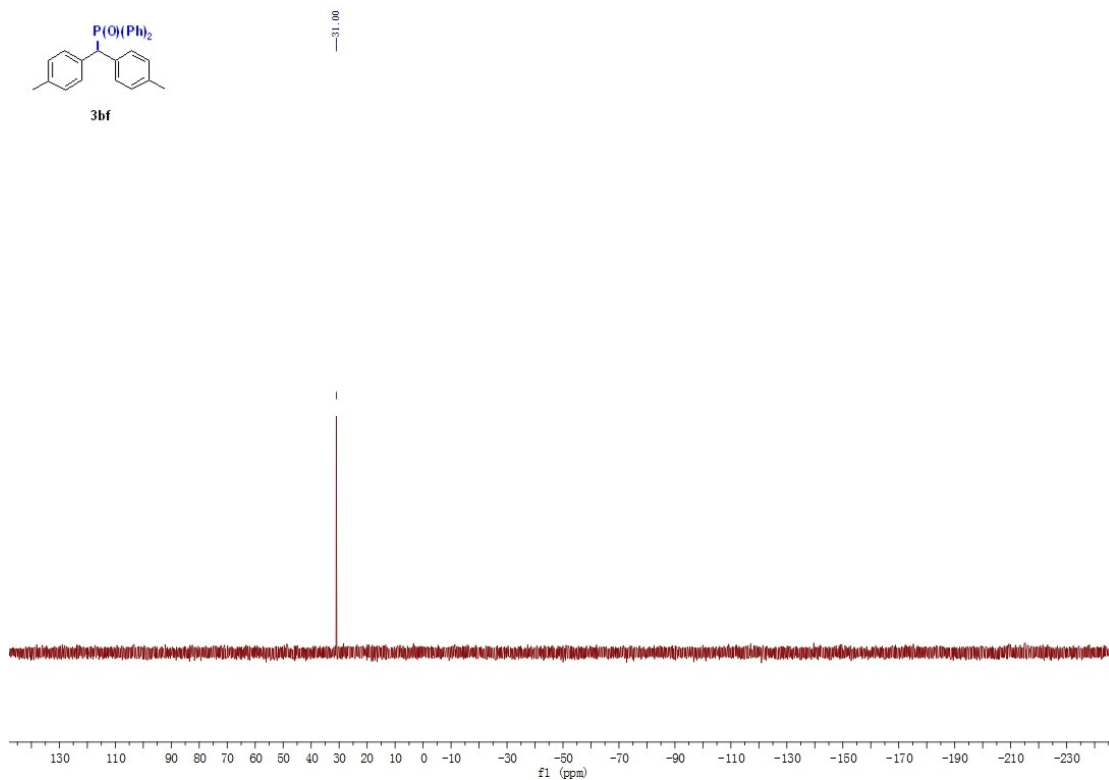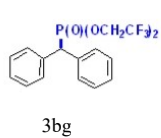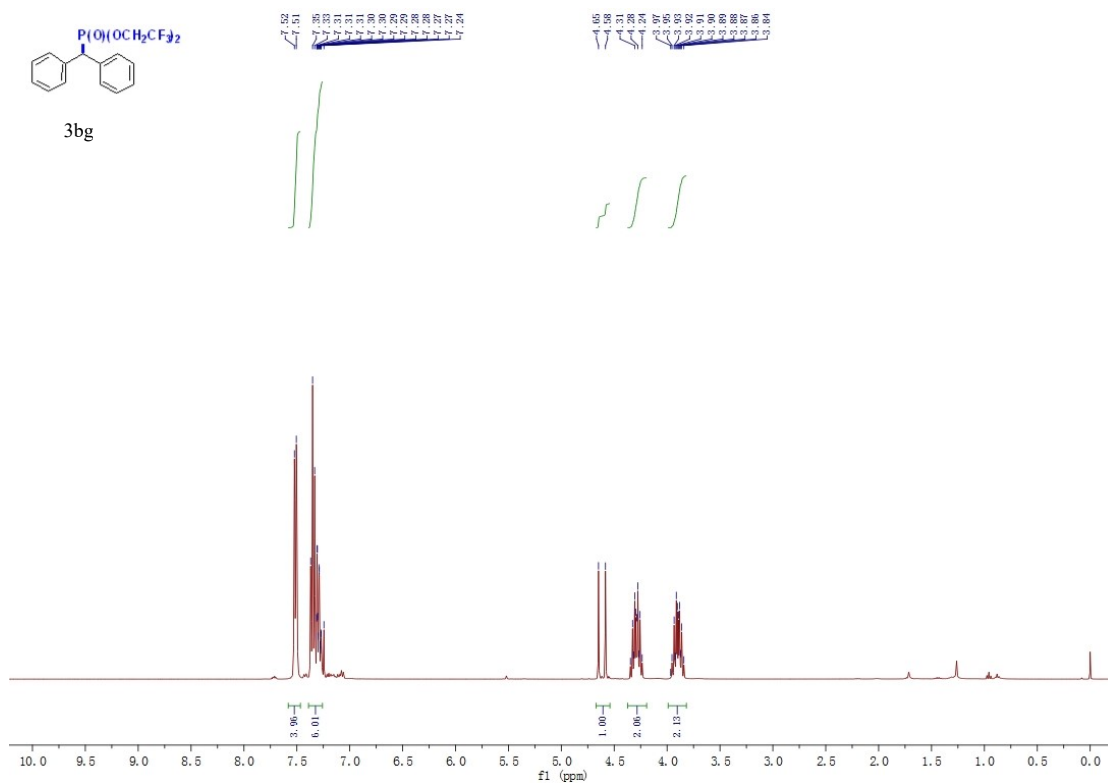

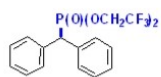

3bg

129.63  
128.96  
127.90  
126.44  
120.93  
118.17

77.32  
76.68  
62.75  
62.37  
61.91  
61.93  
-51.58  
-50.20

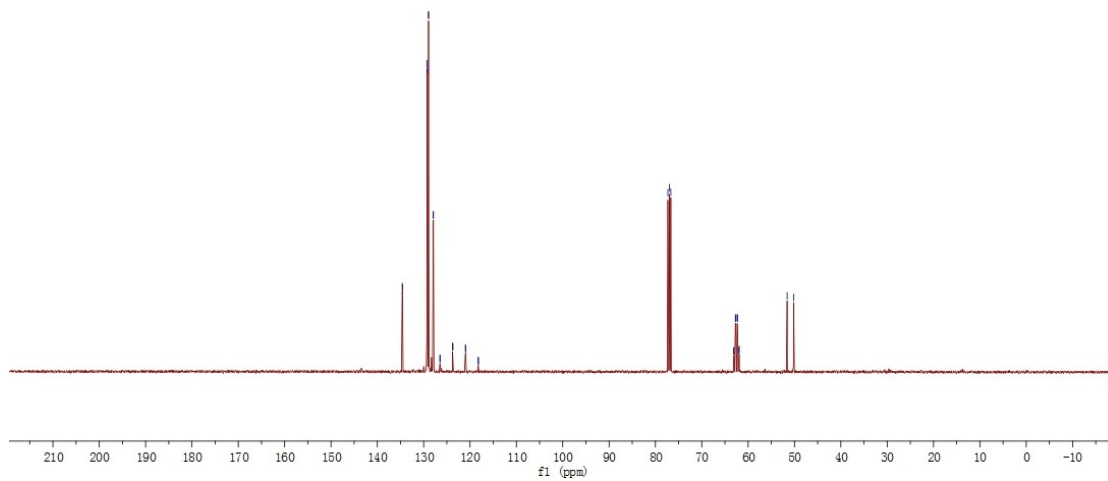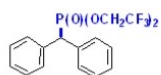

3bg

-28.06

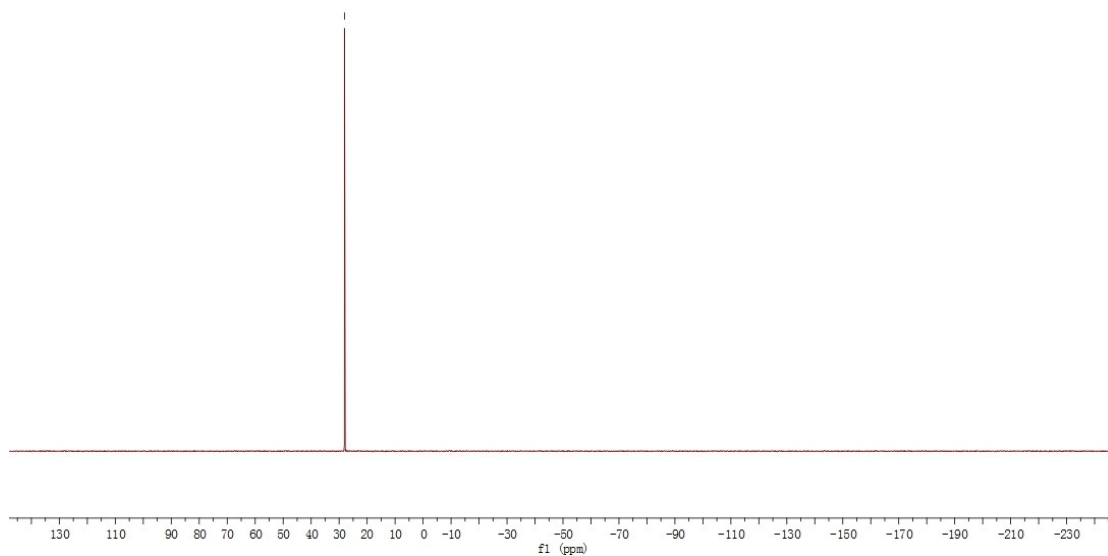







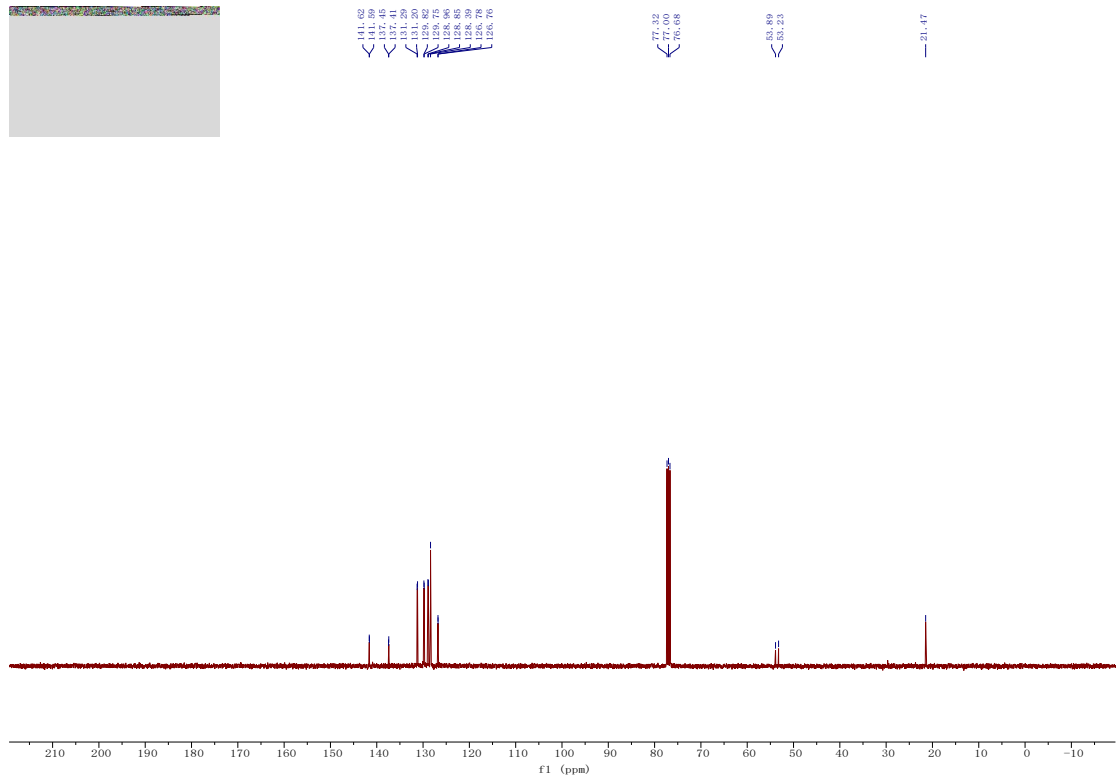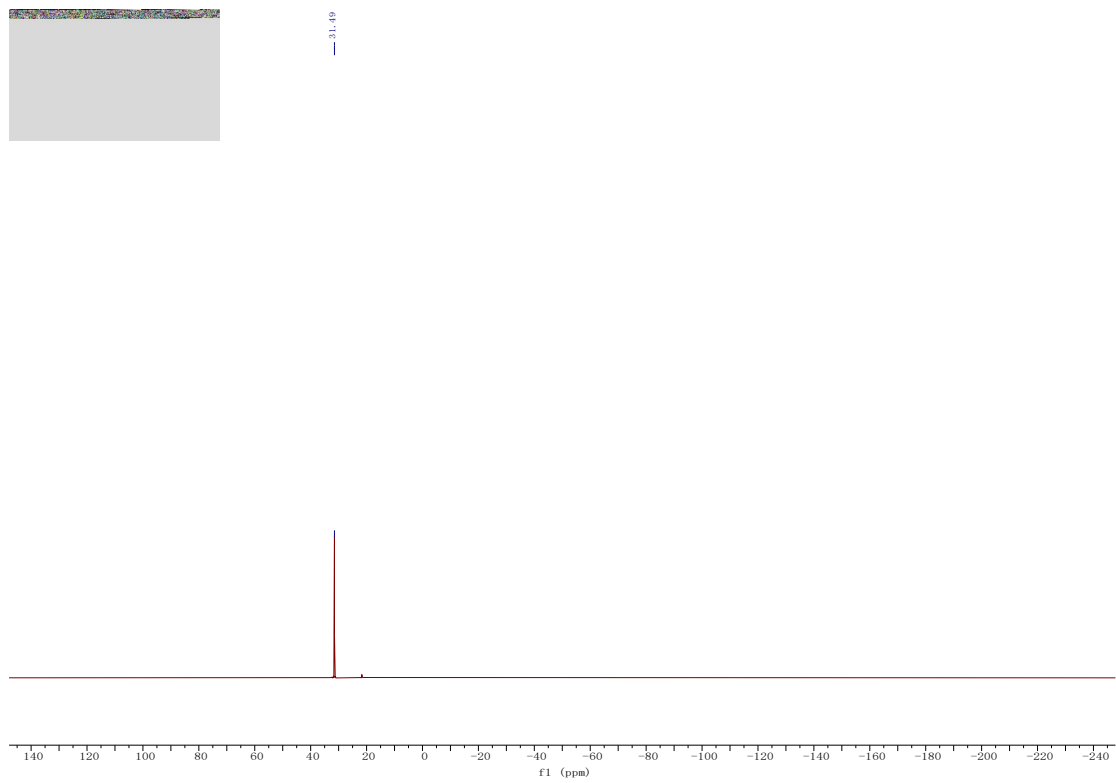

Supplement: d3ra08214h1.pdf [file d3ra08214h1.pdf]
